# Supplementary material for: Widely untargeted metabolomic profiling unearths metabolites and pathways involved in leaf senescence and N remobilization in spring-cultivated wheat under different N regimes
Source: Front Plant Sci. 2023 May 16;14:1166933. doi: 10.3389/fpls.2023.1166933 (PMC10227437; doi:10.3389/fpls.2023.1166933)
Supplement: Supplementary file 1 [file DataSheet_1.xlsx]

## Sheet: Table S1
Supplementary Table S1: Eight hundred and twenty six metabolites detected in this study and annotated on some public databases.
Metabolite	Formula	Exact.Mass	KEGG Compount Name	HMDB	Class	PubChem	NIKKAJI	ChEBI	Pathway
1-Aminocyclopropanecarboxylic acid	C4H7NO2	101.048	1-Aminocyclopropane-1-carboxylate	HMDB0036458	Carboxylic acids and derivatives	4455	J83.133F	18053	map00270 Cysteine and methionine metabolism;map01060 Biosynthesis of plant secondary metabolites;map01070 Biosynthesis of plant hormones;map01100 Metabolic pathways;map01110 Biosynthesis of secondary metabolites;
4-Aminobutyric acid	C4H9NO2	103.063	4-Aminobutanoate	HMDB0000112	Carboxylic acids and derivatives	3628	J1.375G	16865	map00250 Alanine, aspartate and glutamate metabolism;map00330 Arginine and proline metabolism;map00410 beta-Alanine metabolism;map00650 Butanoate metabolism;map00760 Nicotinate and nicotinamide metabolism;map01100 Metabolic pathways;map01120 Microbial metabolism in diverse environments;map02024 Quorum sensing;map04024 cAMP signaling pathway;map04080 Neuroactive ligand-receptor interaction;map0472…
Methyl jasmonate	C13H20O3	224.141	Methyl jasmonate	HMDB0036583	Fatty Acyls	13682	J128.619F	15929	map00592 alpha-Linolenic acid metabolism;map01110 Biosynthesis of secondary metabolites;
Galangin	C15H10O5	270.053	Galangin	HMDB0029521	Flavonoids	12230	J1.607A	5262	map00941 Flavonoid biosynthesis;
Genistein	C15H10O5	270.053	Genistein	HMDB0003217	Isoflavonoids	8792	J39.883G	28088	map00943 Isoflavonoid biosynthesis;map01061 Biosynthesis of phenylpropanoids;map01100 Metabolic pathways;map01110 Biosynthesis of secondary metabolites;
5-Hydroxylysine	C6H14N2O3	162.1	L-Hydroxylysine	HMDB0000450	Carboxylic acids and derivatives	96023265	J38.540I	18040	map00310 Lysine degradation;map01100 Metabolic pathways;
Indole-3-carboxaldehyde	C10H12N4O5	268.081	Inosine	HMDB0000195	Purine nucleosides	3588	J1.388I	17596	map00230 Purine metabolism;map01100 Metabolic pathways;map02010 ABC transporters;
Hyperoside	C21H20O12	464.095	Hyperin	HMDB0030775	Flavonoids	12259	J12.400A	67486
DL-Dihydrozeatin
Diosmetin	C16H12O6	300.063	Diosmetin	HMDB0029676	Flavonoids	12224	J831A	4630
Glycitein	C16H12O5	284.068	Glycitein	HMDB0005781	Isoflavonoids	17395536	J17.583H	34778	map00943 Isoflavonoid biosynthesis;map01110 Biosynthesis of secondary metabolites;
Genistin	C21H20O10	432.106	Genistein 7-O-beta-D-glucoside	HMDB0033988	Isoflavonoids	11318	J40.719D	27514	map00943 Isoflavonoid biosynthesis;
Vitexin	C21H20O10	432.106	Vitexin						map00941 Flavonoid biosynthesis;map00944 Flavone and flavonol biosynthesis;
1-Methy-L-histidine
3-Methy-L-histidine
trans-Zeatin	C10H13N5O	219.112	trans-Zeatin	HMDB12204	Imidazopyrimidines				map00908 Zeatin biosynthesis;map01060 Biosynthesis of plant secondary metabolites;map01070 Biosynthesis of plant hormones;map01100 Metabolic pathways;map01110 Biosynthesis of secondary metabolites;map04075 Plant hormone signal transduction;
cis-Zeatin	C10H13N5O	219.112	cis-Zeatin						map00908 Zeatin biosynthesis;map01070 Biosynthesis of plant hormones;map01100 Metabolic pathways;map01110 Biosynthesis of secondary metabolites;
isoliquiritigenin	C15H12O4	256.074	Isoliquiritigenin	HMDB0037316	Linear 1,3-diarylpropanoids	10843	J74.686J	310312	map00941 Flavonoid biosynthesis;map01061 Biosynthesis of phenylpropanoids;map01110 Biosynthesis of secondary metabolites;
Apigenin	C15H10O5	270.053	Apigenin	HMDB0002124	Flavonoids	4649	J6.601J	18388	map00941 Flavonoid biosynthesis;map00943 Isoflavonoid biosynthesis;map00944 Flavone and flavonol biosynthesis;map01061 Biosynthesis of phenylpropanoids;map01100 Metabolic pathways;map01110 Biosynthesis of secondary metabolites;
Chalconaringenin	C15H12O5	272.068	Naringenin chalcone	HMDB0029631	Linear 1,3-diarylpropanoids	8790	J16.987K	15413	map00941 Flavonoid biosynthesis;map01061 Biosynthesis of phenylpropanoids;map01100 Metabolic pathways;map01110 Biosynthesis of secondary metabolites;
Naringenin	C15H12O5	272.068	Naringenin	HMDB0002670	Flavonoids	3792	J325.849A	17846	map00941 Flavonoid biosynthesis;map00943 Isoflavonoid biosynthesis;map01061 Biosynthesis of phenylpropanoids;map01100 Metabolic pathways;map01110 Biosynthesis of secondary metabolites;
Luteolin	C15H10O6	286.048	Luteolin	HMDB0005800	Flavonoids	4680	J1.554G	15864	map00941 Flavonoid biosynthesis;map00944 Flavone and flavonol biosynthesis;map01100 Metabolic pathways;map01110 Biosynthesis of secondary metabolites;
Fisetin	C15H10O6	286.048	Fisetin
Eriodictyol	C15H12O6	288.063	Eriodictyol	HMDB0005810	Flavonoids	7944	J139.243C	28412	map00941 Flavonoid biosynthesis;map01100 Metabolic pathways;map01110 Biosynthesis of secondary metabolites;
Tectorigenin	C16H12O6	300.063	Tectorigenin	HMDB0042024	Isoflavonoids	12717	J6.452A	9429
Gallocatechin
Myricetin	C15H10O8	318.038	Myricetin	HMDB0002755	Flavonoids	12293	J1.585G	18152	map00941 Flavonoid biosynthesis;map00944 Flavone and flavonol biosynthesis;map01110 Biosynthesis of secondary metabolites;
Dihydromyricetin	C28H22O6	454.142		HMDB0040894	Stilbenes
Tangeretin	C20H20O7	372.121	Tangeretin	HMDB30539	Flavonoids
sinensetin	C20H20O7	372.121	Sinensetin	HMDB0036633	Flavonoids	12372	J94.519F
Daidzin	C21H20O9	416.111	Daidzin	HMDB0033991	Isoflavonoids	12402	J22.589D	42202	map00943 Isoflavonoid biosynthesis;
Glycitin	C22H22O10	446.121		HMDB0002219	Isoflavonoids			1097945
Astragalin	C21H20O11	448.101	Kaempferol 3-O-glucoside	HMDB0037429	Flavonoids	14394	J12.462A	30200	map00944 Flavone and flavonol biosynthesis;map01110 Biosynthesis of secondary metabolites;
Cynaroside	C21H20O11	448.101	Luteolin 7-O-beta-D-glucoside	HMDB0035588	Flavonoids	6673	J94.450E	27994	map00944 Flavone and flavonol biosynthesis;
Homoorientin	C21H20O11	448.101	Homoorientin
Rhoifolin	C27H30O14	578.164	Apigenin 7-O-neohesperidoside	HMDB0038848		583017	J13.923H		map00944 Flavone and flavonol biosynthesis;
Vitexin rhamnoside	C27H30O14	578.164		HMDB0039855	Flavonoids
Kaempferol-3-O-rutinoside	C27H30O15	594.158		HMDB0037574	Flavonoids
Diosmin	C28H32O15	608.174	Diosmin	HMDB0029548	Flavonoids	12225	J6.600A	1188022
Rutin	C27H30O16	610.153	Rutin	HMDB0003249	Flavonoids	7941	J818D	28527	map00944 Flavone and flavonol biosynthesis;map01100 Metabolic pathways;map01110 Biosynthesis of secondary metabolites;
Puerarin	C21H20O9	416.111		HMDB0240265	Phenylpropanoids and polyketides
Isorhamnetin	C16H12O7	316.058	Isorhamnetin	HMDB0002655	Flavonoids	12270	J1.543A	6052
beta-Alanine	C3H7NO2	89.0477	beta-Alanine	HMDB0000056	Carboxylic acids and derivatives	3399	J4.070C	16958	map00240 Pyrimidine metabolism;map00410 beta-Alanine metabolism;map00640 Propanoate metabolism;map00770 Pantothenate and CoA biosynthesis;map01100 Metabolic pathways;map01110 Biosynthesis of secondary metabolites;map04080 Neuroactive ligand-receptor interaction;map04974 Protein digestion and absorption;
L-Valine	C5H11NO2	117.079	L-Valine	HMDB0000883	Carboxylic acids and derivatives	3483	J9.179K	16414	map00280 Valine, leucine and isoleucine degradation;map00290 Valine, leucine and isoleucine biosynthesis;map00311 Penicillin and cephalosporin biosynthesis;map00460 Cyanoamino acid metabolism;map00770 Pantothenate and CoA biosynthesis;map00966 Glucosinolate biosynthesis;map00970 Aminoacyl-tRNA biosynthesis;map01060 Biosynthesis of plant secondary metabolites;map01063 Biosynthesis of alkaloids der…
L-Threonine	C4H9NO3	119.058	L-Threonine	HMDB0000167	Carboxylic acids and derivatives	3488	J21.883I	16857	map00260 Glycine, serine and threonine metabolism;map00261 Monobactam biosynthesis;map00290 Valine, leucine and isoleucine biosynthesis;map00860 Porphyrin and chlorophyll metabolism;map00970 Aminoacyl-tRNA biosynthesis;map00997 Biosynthesis of various secondary metabolites - part 3;map01060 Biosynthesis of plant secondary metabolites;map01100 Metabolic pathways;map01110 Biosynthesis of secondary …
Proline;L-Proline
L-Serine	C3H7NO3	105.043	L-Serine	HMDB0000187	Carboxylic acids and derivatives	3365	J1.195I	17115	map00260 Glycine, serine and threonine metabolism;map00261 Monobactam biosynthesis;map00270 Cysteine and methionine metabolism;map00460 Cyanoamino acid metabolism;map00600 Sphingolipid metabolism;map00630 Glyoxylate and dicarboxylate metabolism;map00680 Methane metabolism;map00920 Sulfur metabolism;map00970 Aminoacyl-tRNA biosynthesis;map00997 Biosynthesis of various secondary metabolites - part …
Methyl (indol-3-yl)acetate;Methyl 3-indolylacetate
L-Arginine	C6H14N4O2	174.112	L-Arginine	HMDB0000517	Carboxylic acids and derivatives	3362	J9.182K	16467	map00220 Arginine biosynthesis;map00261 Monobactam biosynthesis;map00330 Arginine and proline metabolism;map00331 Clavulanic acid biosynthesis;map00472 D-Arginine and D-ornithine metabolism;map00970 Aminoacyl-tRNA biosynthesis;map00997 Biosynthesis of various secondary metabolites - part 3;map01060 Biosynthesis of plant secondary metabolites;map01064 Biosynthesis of alkaloids derived from ornithi…
L-Asparagine	C4H8N2O3	132.053	L-Asparagine	HMDB0000168	Carboxylic acids and derivatives	3452	J9.178B	17196	map00250 Alanine, aspartate and glutamate metabolism;map00460 Cyanoamino acid metabolism;map00970 Aminoacyl-tRNA biosynthesis;map01060 Biosynthesis of plant secondary metabolites;map01100 Metabolic pathways;map01110 Biosynthesis of secondary metabolites;map01230 Biosynthesis of amino acids;map04974 Protein digestion and absorption;map04978 Mineral absorption;map05230 Central carbon metabolism in …
L-Ornithine	C5H12N2O2	132.09	L-Ornithine	HMDB0000214	Carboxylic acids and derivatives	3377	J9.177D	15729	map00220 Arginine biosynthesis;map00330 Arginine and proline metabolism;map00472 D-Arginine and D-ornithine metabolism;map00480 Glutathione metabolism;map00997 Biosynthesis of various secondary metabolites - part 3;map01060 Biosynthesis of plant secondary metabolites;map01064 Biosynthesis of alkaloids derived from ornithine, lysine and nicotinic acid;map01100 Metabolic pathways;map01110 Biosynthe…
L-Aspartic acid	C4H7NO4	133.038	L-Aspartate	HMDB0000191	Carboxylic acids and derivatives	3351	J9.169C	17053	map00220 Arginine biosynthesis;map00250 Alanine, aspartate and glutamate metabolism;map00260 Glycine, serine and threonine metabolism;map00261 Monobactam biosynthesis;map00270 Cysteine and methionine metabolism;map00300 Lysine biosynthesis;map00340 Histidine metabolism;map00410 beta-Alanine metabolism;map00460 Cyanoamino acid metabolism;map00710 Carbon fixation in photosynthetic organisms;map0076…
L-Citruline;L-Citrulline
L-Glutamic acid	C5H9NO4	147.053	L-Glutamate	HMDB0000148	Carboxylic acids and derivatives	3327	J9.171E	16015	map00220 Arginine biosynthesis;map00250 Alanine, aspartate and glutamate metabolism;map00330 Arginine and proline metabolism;map00332 Carbapenem biosynthesis;map00340 Histidine metabolism;map00430 Taurine and hypotaurine metabolism;map00471 D-Glutamine and D-glutamate metabolism;map00480 Glutathione metabolism;map00524 Neomycin, kanamycin and gentamicin biosynthesis;map00630 Glyoxylate and dicarb…
Glycine	C2H5NO2	75.032	Glycine	HMDB0000123	Carboxylic acids and derivatives	3339	J1.163K	15428	map00120 Primary bile acid biosynthesis;map00230 Purine metabolism;map00260 Glycine, serine and threonine metabolism;map00310 Lysine degradation;map00440 Phosphonate and phosphinate metabolism;map00460 Cyanoamino acid metabolism;map00480 Glutathione metabolism;map00630 Glyoxylate and dicarboxylate metabolism;map00680 Methane metabolism;map00730 Thiamine metabolism;map00860 Porphyrin and chlorophy…
L-Histidine	C6H9N3O2	155.069	L-Histidine	HMDB0000177	Carboxylic acids and derivatives	3435	J4.881J	15971	map00340 Histidine metabolism;map00404 Staurosporine biosynthesis;map00410 beta-Alanine metabolism;map00970 Aminoacyl-tRNA biosynthesis;map01060 Biosynthesis of plant secondary metabolites;map01065 Biosynthesis of alkaloids derived from histidine and purine;map01100 Metabolic pathways;map01110 Biosynthesis of secondary metabolites;map01230 Biosynthesis of amino acids;map02010 ABC transporters;map…
trans-4-Hydroxy-L-proline;4-Hydroxyproline
L-Methionine	C5H11NO2S	149.051	L-Methionine	HMDB0000696	Carboxylic acids and derivatives	3373	J9.174J	16643	map00270 Cysteine and methionine metabolism;map00966 Glucosinolate biosynthesis;map00970 Aminoacyl-tRNA biosynthesis;map01060 Biosynthesis of plant secondary metabolites;map01070 Biosynthesis of plant hormones;map01100 Metabolic pathways;map01110 Biosynthesis of secondary metabolites;map01210 2-Oxocarboxylic acid metabolism;map01230 Biosynthesis of amino acids;map01523 Antifolate resistance;map04…
L-Alanine;DL-Alanine
L-Lysine;L-Glutamine
Nicotinic acid adenine dinucleotide;NAD
Trigonelline	C7H7NO2	137.048	N-Methylnicotinate	HMDB0000875		4250	J6.346K	18123	map00760 Nicotinate and nicotinamide metabolism;
Anthranilic acid	C7H7NO2	137.048	Anthranilate	HMDB0001123	Benzene and substituted derivatives	3408	J2.912B	30754	map00380 Tryptophan metabolism;map00400 Phenylalanine, tyrosine and tryptophan biosynthesis;map00405 Phenazine biosynthesis;map00621 Dioxin degradation;map00627 Aminobenzoate degradation;map00998 Biosynthesis of various secondary metabolites - part 2;map01058 Acridone alkaloid biosynthesis;map01060 Biosynthesis of plant secondary metabolites;map01061 Biosynthesis of phenylpropanoids;map01063 Bios…
p-Aminobenzoate	C7H7NO2	137.048	p-Aminobenzoate	HMDB01392	Benzene and substituted derivatives				map00627 Aminobenzoate degradation;map00790 Folate biosynthesis;map01061 Biosynthesis of phenylpropanoids;map01100 Metabolic pathways;map01120 Microbial metabolism in diverse environments;
Betaine aldehyde	C5H12NO	102.092	Betaine aldehyde	HMDB0001252	Organonitrogen compounds	3855	J413.989E	15710	map00260 Glycine, serine and threonine metabolism;map01100 Metabolic pathways;
Epiandrosterone	C19H30O2	290.225	Epiandrosterone	HMDB0000365	Steroids and steroid derivatives	9837	J9.233I		map00984 Steroid degradation;map01120 Microbial metabolism in diverse environments;
Androsterone	C19H30O2	290.225	Androsterone	HMDB0000031	Steroids and steroid derivatives	3806	J4.145I	16032	map00140 Steroid hormone biosynthesis;
Etiocholanolone	C19H30O2	290.225	Etiocholanolone	HMDB0000490	Steroids and steroid derivatives	7015	J4.146G	28195	map00140 Steroid hormone biosynthesis;
Epitulipinolide
4-Methoxyphenyl beta-D-glucopyranoside
2-O-Methylanigorufone
Kaempferol	C15H10O6	286.048	Kaempferol	HMDB0005801	Flavonoids	8191	J1.575J	28499	map00941 Flavonoid biosynthesis;map00944 Flavone and flavonol biosynthesis;map01061 Biosynthesis of phenylpropanoids;map01100 Metabolic pathways;map01110 Biosynthesis of secondary metabolites;
Isosakuranetin	C16H14O5	286.084	Isosakuranetin						map00941 Flavonoid biosynthesis;map01110 Biosynthesis of secondary metabolites;
Cyanidin	C15H11O6	287.056	Cyanidin	HMDB02708	Flavonoids				map00941 Flavonoid biosynthesis;map00942 Anthocyanin biosynthesis;map01061 Biosynthesis of phenylpropanoids;map01100 Metabolic pathways;map01110 Biosynthesis of secondary metabolites;
Brazilin	C16H14O5	286.084	Brazilin
2',3,5,7-Tetrahydroxyflavone
Orobol (5,7,3',4'-tetrahydroxyisoflavone)
Scutellarein	C15H10O6	286.048	Scutellarein
Demethoxycapillarisin
Citreorosein	C15H10O6	286.048	Citreorosein	HMDB0034444	Anthracenes	96024115	J13.188A
2'-Hydroxygenistein	C15H10O6	286.048	2'-Hydroxygenistein	HMDB0034014	Isoflavonoids	14281	J397.872I	70031	map00943 Isoflavonoid biosynthesis;
(-)-Sativan	C17H18O4	286.121	(-)-Sativan	HMDB0030521	Isoflavonoids	12709	J451.759H
Sakuranetin	C16H14O5	286.084	Sakuranetin	HMDB0030090	Flavonoids	12021	J7.652J	28927	map00941 Flavonoid biosynthesis;map01110 Biosynthesis of secondary metabolites;
L-3-Phenyllactic acid	C9H10O3	166.063	Phenyllactate	HMDB0000748	Phenylpropanoic acids	7930	J70.490C	32978	map00360 Phenylalanine metabolism;map00960 Tropane, piperidine and pyridine alkaloid biosynthesis;map01064 Biosynthesis of alkaloids derived from ornithine, lysine and nicotinic acid;map01100 Metabolic pathways;
Acetovanillone	C9H10O3	166.063	Acetovanillone
Indole	C8H7N	117.058	Indole	HMDB0000738	Indoles and derivatives	3747	J2.920C	16881	map00380 Tryptophan metabolism;map00400 Phenylalanine, tyrosine and tryptophan biosynthesis;map00402 Benzoxazinoid biosynthesis;map01100 Metabolic pathways;map01110 Biosynthesis of secondary metabolites;map04974 Protein digestion and absorption;
Betaine	C5H11NO2	117.079	Betaine	HMDB0000043	Carboxylic acids and derivatives	3985	J5.058J	17750	map00260 Glycine, serine and threonine metabolism;map01100 Metabolic pathways;map02010 ABC transporters;
5-Aminovaleric acid	C5H11NO2	117.079	5-Aminopentanoate	HMDB0003355	Carboxylic acids and derivatives	3720	J38.132B	15887	map00310 Lysine degradation;map00330 Arginine and proline metabolism;map01100 Metabolic pathways;map01120 Microbial metabolism in diverse environments;
Guanidineacetic acid	C3H7N3O2	117.054	Guanidinoacetate	HMDB0000128	Carboxylic acids and derivatives	3860	J4.504G	16344	map00260 Glycine, serine and threonine metabolism;map00330 Arginine and proline metabolism;map01100 Metabolic pathways;
Aminomalonic acid	C3H5NO4	119.022	Aminomalonate	HMDB0001147	Carboxylic acids and derivatives	4129	J556H	17475
D-Proline	C5H9NO2	115.063	D-Proline	HMDB0003411	Carboxylic acids and derivatives	4025	J9.118I	16313	map00330 Arginine and proline metabolism;map01100 Metabolic pathways;
Maltol	C6H6O3	126.032	Maltol	HMDB0030776	Pyrans	14079	J2.910F	142577	map00523 Polyketide sugar unit biosynthesis;map01110 Biosynthesis of secondary metabolites;
5-Hydroxymethylfurfural	C6H6O3	126.032	5-Hydroxymethyl-2-furaldehyde	HMDB0034355	Carbonyl compounds	13283	J4.850J	412516	map00365 Furfural degradation;map01120 Microbial metabolism in diverse environments;
2-Hydroxyethanesulfonate	C2H6O4S	125.999	2-Hydroxyethanesulfonate	HMDB0003903	Organic sulfonic acids and derivatives	7545	J5.057A	1157	map00430 Taurine and hypotaurine metabolism;map01100 Metabolic pathways;
D-alpha-Aminobutyric acid	C4H9NO2	103.063	D-2-Aminobutyrate	HMDB0000650	Carboxylic acids and derivatives	5323	J1.815E	28797
N,N-Dimethylglycine	C4H9NO2	103.063	N,N-Dimethylglycine	HMDB0000092	Carboxylic acids and derivatives	4271	J135.420E	17724	map00260 Glycine, serine and threonine metabolism;map01100 Metabolic pathways;
2-Aminoisobutyric acid	C4H9NO2	103.063	2-Amino-2-methylpropanoate	HMDB0001906	Carboxylic acids and derivatives	6443	J38.908K	27971
N-Ethylglycine	C4H9NO2	103.063	N-Ethylglycine	HMDB0041945	Carboxylic acids and derivatives	13900	J134.751I	15620
3-Aminoisobutanoic acid	C4H9NO2	103.063	3-Aminoisobutyric acid	HMDB0003911	Carboxylic acids and derivatives	7563	J79.462G	27389
O-Acetylethanolamine	C4H9NO2	103.063		HMDB0038394	Carboxylic acids and derivatives
Schizandrin C	C22H24O6	384.157	Schizandrin C
5-Hydroxyindole-3-acetic acid	C10H9NO3	191.058	5-Hydroxyindoleacetate	HMDB0000763	Indoles and derivatives	7946	J11.030B	27823	map00380 Tryptophan metabolism;map01100 Metabolic pathways;map04726 Serotonergic synapse;
Phendimetrazine	C12H17NO	191.131	Phendimetrazine	HMDB0015519	Oxazinanes	10106	J6.905A	674499
Urocanic acid	C6H6N2O2	138.043	Urocanate	HMDB0000301	Azoles	4043	J5.039C	30817	map00340 Histidine metabolism;map01100 Metabolic pathways;
2,5-Dihydroxybenzaldehyde	C7H6O3	138.032	Gentisate aldehyde	HMDB0004062	Organooxygen compounds	7911	J7.451I	28508	map00350 Tyrosine metabolism;map01100 Metabolic pathways;map01120 Microbial metabolism in diverse environments;
3,4-Dihydroxybenzaldehyde;Protocatechuic aldehyde; 3,4-Dihydroxybenzaldehyde
3-Ethyl-1,2-benzenediol	C8H10O2	138.068	3-Ethylcatechol	HMDB0040177	Phenols	8950	J801.879K	16572	map00642 Ethylbenzene degradation;map01100 Metabolic pathways;map01120 Microbial metabolism in diverse environments;map01220 Degradation of aromatic compounds;
Sesamol	C7H6O3	138.032	Sesamol	HMDB0033812	Benzodioxoles	13015	J1.589J
Ursodeoxycholic acid	C24H40O4	392.293	Ursodiol	HMDB0000946	Steroids and steroid derivatives	10082	J2.520H	9907	map00121 Secondary bile acid biosynthesis;
D-Serine	C3H7NO3	105.043	D-Serine	HMDB0003406	Carboxylic acids and derivatives	4003	J1.196G	16523	map00260 Glycine, serine and threonine metabolism;map01100 Metabolic pathways;map01502 Vancomycin resistance;map04742 Taste transduction;
Diethanolamine	C4H11NO2	105.079	Diethanolamine	HMDB0004437	Organonitrogen compounds	8992	J808G	28123	map00564 Glycerophospholipid metabolism;
Venlafaxine	C17H27NO2	277.204	Venlafaxine	HMDB0005016	Phenol ethers	9396	J347.732K	9943
Xylometazoline	C16H24N2	244.194	Xylometazoline	HMDB0015640	Benzene and substituted derivatives	10115	J6.660E	214810
Osthol	C15H16O3	244.11	Osthol
Linderalactone	C15H16O3	244.11	Linderalactone
threo-1-C-Syringylglycerol
Uridine	C9H12N2O6	244.07	Uridine	HMDB0000296	Pyrimidine nucleosides	3593	J4.593D	16704	map00240 Pyrimidine metabolism;map01100 Metabolic pathways;map02010 ABC transporters;
Panaxynol	C17H24O	244.183	(3S,9Z)-1,9-Heptadecadiene-4,6-diyn-3-ol	HMDB0039588	Fatty Acyls	96023797	J11.508H
2-Hydroxycinnamic acid	C9H8O3	164.047	trans-2-Hydroxycinnamate	HMDB0002641	Cinnamic acids and derivatives	4905	J55.415D	18125	map00360 Phenylalanine metabolism;map00940 Phenylpropanoid biosynthesis;map01100 Metabolic pathways;map01110 Biosynthesis of secondary metabolites;map01120 Microbial metabolism in diverse environments;
Enol-phenylpyruvate	C9H8O3	164.047	2-Hydroxy-3-phenylpropenoate	HMDB0012225	Benzene and substituted derivatives	5719	J899.575C	16815	map00360 Phenylalanine metabolism;map01100 Metabolic pathways;
Ethyl phenylacetate	C10H12O2	164.084		HMDB0032618	Benzene and substituted derivatives
Cinnamic acid	C9H8O2	148.052	Cinnamic acid	HMDB0000567	Cinnamic acids and derivatives	12623	J2.087G	35699
3,4-Dihydrocoumarin	C9H8O2	148.052	Dihydrocoumarin	HMDB0036626	3,4-dihydrocoumarins	5334	J36.832F	16151	map00624 Polycyclic aromatic hydrocarbon degradation;map01120 Microbial metabolism in diverse environments;
5-oxoproline	C5H7NO3	129.043	5-Oxoproline	HMDB00267	Carboxylic acids and derivatives				map00480 Glutathione metabolism;map01100 Metabolic pathways;
2-(Methylamino)benzoic acid	C8H9NO2	151.063	N-Methylanthranilate	HMDB0032609	Benzene and substituted derivatives	5914	J5.315E	16394	map01058 Acridone alkaloid biosynthesis;map01063 Biosynthesis of alkaloids derived from shikimate pathway;map01110 Biosynthesis of secondary metabolites;
L-Carnitine	C7H15NO3	161.105	L-Carnitine	HMDB0000062	Organonitrogen compounds	3612	J9.362I	16347	map04714 Thermogenesis;map04976 Bile secretion;
Pimelic acid	C7H12O4	160.074	Pimelate	HMDB0000857	Fatty Acyls	5629	J5.105E	30531	map00780 Biotin metabolism;map01100 Metabolic pathways;
Ethyl isovalerate	C7H14O2	130.099	Ethyl isovalerate	HMDB0030028	Fatty Acyls	14434	J1.967D	31571
3-Octyl alcohol
Terpinolene	C10H16	136.125	Terpinolene	HMDB0036994	Prenol lipids	8341	J9.438B	9457
6-hydroxynicotinic acid	C6H5NO3	139.027	6-Hydroxynicotinate	HMDB0002658	Pyridines and derivatives	4265	J208I	16168	map00760 Nicotinate and nicotinamide metabolism;map01100 Metabolic pathways;map01120 Microbial metabolism in diverse environments;
3-Hydroxypicolinic acid	C6H5NO3	139.027	3-Hydroxypicolinic acid	HMDB0013188	Pyridines and derivatives	124489294		64342
N-Acetyl-L-glutamate 5-semialdehyde	C7H11NO4	173.069	N-Acetyl-L-glutamate 5-semialdehyde	HMDB0006488	Carboxylic acids and derivatives	4470	J37.498I	16319	map00220 Arginine biosynthesis;map00330 Arginine and proline metabolism;map01100 Metabolic pathways;map01110 Biosynthesis of secondary metabolites;map01210 2-Oxocarboxylic acid metabolism;map01230 Biosynthesis of amino acids;
N-Acetyl-l-leucine	C8H15NO3	173.105	N-Acetyl-L-leucine	HMDB0011756	Carboxylic acids and derivatives	5673	J23.189D	17786
Xanthotoxol	C11H6O4	202.027	Xanthotoxol	HMDB0029457	Coumarins and derivatives	4098	J7.847F	15709	map01061 Biosynthesis of phenylpropanoids;
Bergaptol	C11H6O4	202.027	Bergaptol	HMDB0013679	Coumarins and derivatives	4020	J12.566K	17377	map01061 Biosynthesis of phenylpropanoids;
4-Sulfobenzoate	C7H6O5S	201.994	4-Sulfobenzoate						map00623 Toluene degradation;map01120 Microbial metabolism in diverse environments;map01220 Degradation of aromatic compounds;
Vasicinone	C11H10N2O2	202.074	Vasicinone
Levamisole	C11H12N2S	204.072	Levamisole	HMDB0014986	Imidazothiazoles	9282	J8.518I	6432
trans-Caryophyllene	C15H24	204.188	beta-Caryophyllene	HMDB0036792	Prenol lipids	11819	J3.212C	10357	map00909 Sesquiterpenoid and triterpenoid biosynthesis;map01100 Metabolic pathways;map01110 Biosynthesis of secondary metabolites;
N5-(L-1-Carboxyethyl)-L-ornithine	C8H16N2O4	204.111	N5-(L-1-Carboxyethyl)-L-ornithine
Bufotenine	C12H16N2O	204.126	Bufotenine	HMDB0041842	Indoles and derivatives	10497	J6.027E	3210
N-Methylcytisine	C12H16N2O	204.126	N-Methylcytisine
Methyleugenol	C11H14O2	178.099	Methyleugenol	HMDB0031864	Benzene and substituted derivatives	12637	J4.669H	4918	map00940 Phenylpropanoid biosynthesis;
Mellein
Phosphorylcholine	C5H15NO4P	184.074	Choline phosphate	HMDB0001565	Organonitrogen compounds	3867	J215.288F	18132	map00564 Glycerophospholipid metabolism;map01100 Metabolic pathways;map05231 Choline metabolism in cancer;
8-Amino-7-oxononanoic acid	C9H17NO3	187.121	8-Amino-7-oxononanoic acid	HMDB37790	Organooxygen compounds				map00780 Biotin metabolism;map01100 Metabolic pathways;
2-Keto-6-acetamidocaproate	C8H13NO4	187.084	6-Acetamido-2-oxohexanoate	HMDB0012150	Keto acids and derivatives	7884	J2.368.593K	28376	map00310 Lysine degradation;map01100 Metabolic pathways;
Deethylatrazine	C6H10ClN5	187.062	Deethylatrazine	HMDB0033249	Triazines	8788	J285.118K	28212	map00791 Atrazine degradation;map01120 Microbial metabolism in diverse environments;
L-Homocitrulline	C7H15N3O3	189.111	L-Homocitrulline	HMDB0000679	Carboxylic acids and derivatives	5455	J14.380D	17443
Tricyclazole	C9H7N3S	189.036	Tricyclazole	HMDB0031809	Azoles	124489166		81783
7-Ethoxycoumarin	C11H10O3	190.063	7-Ethoxycoumarin
Ligustilide	C12H14O2	190.099		HMDB0034277	Dihydrofurans
Altechromone A
Cantharidin	C10H12O4	196.074	Cantharidin
Geranylacetate
Bornyl acetate	C12H20O2	196.146	Bornyl acetate	HMDB40725	Prenol lipids
Jasmonic acid	C12H18O3	210.126	(-)-Jasmonic acid	HMDB0032797	Fatty Acyls	10684	J15.678G	18292	map00592 alpha-Linolenic acid metabolism;map01060 Biosynthesis of plant secondary metabolites;map01070 Biosynthesis of plant hormones;map01100 Metabolic pathways;map01110 Biosynthesis of secondary metabolites;map04075 Plant hormone signal transduction;
3-(3,4-Dihydroxy-5-methoxy)-2-propenoic acid	C10H10O5	210.053	5-Hydroxyferulic acid methyl ester	HMDB0035484	Cinnamic acids and derivatives	7937	J821.082I	2069	map00940 Phenylpropanoid biosynthesis;map01061 Biosynthesis of phenylpropanoids;map01100 Metabolic pathways;map01110 Biosynthesis of secondary metabolites;
Lactaroviolin	C15H14O	210.104	Lactaroviolin	HMDB0035896	Prenol lipids	11886	J4.915H
Harmaline	C13H14N2O	214.111	Harmaline	HMDB0030310	Harmala alkaloids	8766	J11.607F	28172	map01063 Biosynthesis of alkaloids derived from shikimate pathway;
Guaiol	C15H26O	222.198	Guaiol
Isofraxidin	C11H10O5	222.053	Isofraxidin
Azithromycin	C38H72N2O12	748.509	Azithromycin	HMDB0014352	Organooxygen compounds	9056	J134.080H	2955
2-Benzal-4-hydroxyacetophenone
2,3-Dihydro-2-phenyl-4H-benzopyran-4-one
Pogostone	C12H16O4	224.105		HMDB0030703	Organooxygen compounds
3,4,5-Trimethoxycinnamyl alcohol
N'-Formylkynurenine	C11H12N2O4	236.08		HMDB0001200	Organooxygen compounds			18377
Lumichrome	C12H10N4O2	242.08	Lumichrome						map00740 Riboflavin metabolism;
Agomelatine	C15H17NO2	243.126		HMDB0015636	Carboxylic acids and derivatives			108209
Muramic acid	C9H17NO7	251.101	Muramic acid	HMDB0003254	Organooxygen compounds	8702	J15.184J	28118
Alloimperatorin	C16H14O4	270.089	Alloimperatorin
Pelargonidin	C15H11O5	271.061	Pelargonidin	HMDB03263	Flavonoids				map00941 Flavonoid biosynthesis;map00942 Anthocyanin biosynthesis;map01100 Metabolic pathways;map01110 Biosynthesis of secondary metabolites;
2'-Hydroxydaidzein	C15H10O5	270.053	2'-Hydroxydaidzein	HMDB0029372	Isoflavonoids	5507	J1.005.532F	27479	map00943 Isoflavonoid biosynthesis;map01110 Biosynthesis of secondary metabolites;
Sulfuretin	C15H10O5	270.053	Sulfuretin
Aloeemodin	C15H10O5	270.053	Aloe-emodin	HMDB0030829	Anthracenes	12480	J5.780K	161756
Lucidin	C15H10O5	270.053	Lucidin
3',4',7-Trihydroxyisoflavone	C15H10O5	270.053	3',4',7-Trihydroxyisoflavone	HMDB41655	Isoflavonoids
Resokaempferol	C15H10O5	270.053	Resokaempherol	HMDB0034004	Flavonoids	12223	J884B
Pinostrobin	C16H14O4	270.089	Pinostrobin						map00941 Flavonoid biosynthesis;
Naringenin chalcone	C15H12O5	272.068	Naringenin chalcone	HMDB0029631	Linear 1,3-diarylpropanoids	8790	J16.987K	15413	map00941 Flavonoid biosynthesis;map01061 Biosynthesis of phenylpropanoids;map01100 Metabolic pathways;map01110 Biosynthesis of secondary metabolites;
Vestitol	C16H16O4	272.105	Vestitol
Glycinol	C15H12O5	272.068	3,6,9-Trihydroxypterocarpan	HMDB0034105	Isoflavonoids	4482	J156.714D	15649	map00943 Isoflavonoid biosynthesis;map01110 Biosynthesis of secondary metabolites;
Pinobanksin	C15H12O5	272.068	Pinobanksin						map00941 Flavonoid biosynthesis;
Nordihydrocapsaicin	C17H27NO3	293.199	Nordihydrocapsaicin	HMDB0036328	Phenols	163311959
Cinchonine	C19H22N2O	294.173	Cinchonine						map01063 Biosynthesis of alkaloids derived from shikimate pathway;
9-OxoODE	C18H30O3	294.219	9-OxoODE	HMDB0004669	Fatty Acyls	17395764	J711.801E	72842	map00591 Linoleic acid metabolism;
Tombozine
(10E,12Z)-(9S)-9-Hydroperoxyoctadeca-10,12-dienoic acid	C18H32O4	312.23	9(S)-HPODE	HMDB0062434	Fatty Acyls	17395825	J293.200H	34498	map00591 Linoleic acid metabolism;map01100 Metabolic pathways;
13-HPODE;13-L-Hydroperoxylinoleic acid
Colneleate	C18H30O3	294.219	Colneleate	HMDB30995	Fatty Acyls
(-)-Cinchonidine	C19H22N2O	294.173	Cinchonidine	HMDB0030282	Cinchona alkaloids	13553	J6.003H		map01063 Biosynthesis of alkaloids derived from shikimate pathway;
6-Gingerol; 6-Gingerol;[6]-Gingerol;Gingerol
5'-S-Methyl-5'-thioadenosine	C11H15N5O3S	297.09	5'-Methylthioadenosine	HMDB0001173	5'-deoxyribonucleosides	3470	J22.737D	17509	map00270 Cysteine and methionine metabolism;map00908 Zeatin biosynthesis;map01060 Biosynthesis of plant secondary metabolites;map01100 Metabolic pathways;
3-Dehydrosphinganine	C18H37NO2	299.282	3-Dehydrosphinganine	HMDB0001480	Organooxygen compounds	5855	J866.542G	17862	map00600 Sphingolipid metabolism;map01100 Metabolic pathways;
Sphingosine	C18H37NO2	299.282	Sphingosine	HMDB0000252	Organonitrogen compounds	3613	J10.894D	16393	map00600 Sphingolipid metabolism;map01100 Metabolic pathways;map04071 Sphingolipid signaling pathway;map04210 Apoptosis;map04217 Necroptosis;
Palmitoylethanolamide	C18H37NO2	299.282	Palmitoylethanolamide	HMDB0002100	Carboximidic acids and derivatives	49661772	J6.414I	71464	map04080 Neuroactive ligand-receptor interaction;
N-Acetyl-D-glucosamine 6-phosphate	C8H16NO9P	301.056	N-Acetyl-D-glucosamine 6-phosphate	HMDB01062	Organooxygen compounds				map00520 Amino sugar and nucleotide sugar metabolism;map01100 Metabolic pathways;map02060 Phosphotransferase system (PTS);
Oxymorphone	C17H19NO4	301.131	Oxymorphone	HMDB0015323	Phenanthrenes and derivatives	10219	J4.174B	194484
Morin	C15H10O7	302.043	Morin	HMDB0030796	Flavonoids	12291	J1.542C	75092
Delphinidin	C15H11O7	303.05	Delphinidin	HMDB03074					map00941 Flavonoid biosynthesis;map00942 Anthocyanin biosynthesis;map01110 Biosynthesis of secondary metabolites;
Robinetin	C15H10O7	302.043	Robinetin
6-Hydroxykaempferol	C15H10O7	302.043	6-Hydroxykaempferol
Lupeol	C30H50O	426.386	Lupeol						map00909 Sesquiterpenoid and triterpenoid biosynthesis;map01062 Biosynthesis of terpenoids and steroids;map01110 Biosynthesis of secondary metabolites;
Taraxasterol	C30H50O	426.386	Taraxasterol	HMDB0035920	Prenol lipids	10829	J7.231A
Simiarenol	C30H50O	426.386	Simiarenol
Shionone	C30H50O	426.386	Shionone
Germanicol	C30H50O	426.386	Germanicol						map00909 Sesquiterpenoid and triterpenoid biosynthesis;
Friedelin	C30H50O	426.386	Friedelin
Cycloeucalenol	C30H50O	426.386	Cycloeucalenol						map00100 Steroid biosynthesis;map01100 Metabolic pathways;map01110 Biosynthesis of secondary metabolites;
Acetic acid m-cresyl ester
Benzyl acetate	C9H10O2	150.068	Benzyl acetate	HMDB0031310	Benzene and substituted derivatives	17396505	J2.950E	52051
(R)-Menthofuran	C10H14O	150.104	Menthofuran	HMDB0036089	Prenol lipids	12054	J11.817F	50542
2-Carboxybenzaldehyde	C8H6O3	150.032	2-Carboxybenzaldehyde						map00624 Polycyclic aromatic hydrocarbon degradation;map01120 Microbial metabolism in diverse environments;
1-(4-Hydroxyphenyl)propan-1-one
p-Coumaryl alcohol	C9H10O2	150.068	p-Coumaryl alcohol	HMDB03654	Cinnamyl alcohols				map00940 Phenylpropanoid biosynthesis;map01061 Biosynthesis of phenylpropanoids;map01100 Metabolic pathways;map01110 Biosynthesis of secondary metabolites;
Octadecanamide	C18H37NO	283.288	Octadecanamide	HMDB0034146	Fatty Acyls	854091	J43.334I	34900
20-HETE	C20H32O3	320.235	20-HETE	HMDB0005998	Fatty Acyls	17395746	J455.066H	34306	map00590 Arachidonic acid metabolism;map01100 Metabolic pathways;map04270 Vascular smooth muscle contraction;
Enoxacin	C15H17FN4O3	320.128	Enoxacin	HMDB0014610	Diazanaphthalenes	9193	J20.568K	157175
Kirenol
Ajmaline	C20H26N2O2	326.199	Ajmaline	HMDB0015495	Ajmaline-sarpagine alkaloids	8772	J15.133E	28462	map00901 Indole alkaloid biosynthesis;map01110 Biosynthesis of secondary metabolites;
Moracin O	C19H18O5	326.115		HMDB0040313	2-arylbenzofuran flavonoids
Docosahexaenoic acid	C22H32O2	328.24	(4Z,7Z,10Z,13Z,16Z,19Z)-Docosahexaenoic acid	HMDB0002183	Fatty Acyls	8664	J381.483A	28125	map01040 Biosynthesis of unsaturated fatty acids;
4',5,7-Trimethoxyflavone	C18H16O5	312.1	6-Hydroxy-2-(4-methoxyphenyl)-5,7-dimethoxy-4H-1-benzopyran-4-one	HMDB0030842	Flavonoids	17395983	J431.737H	729069
Anisatin	C15H20O8	328.116	Anisatin
Tricin	C17H14O7	330.074	Tricin
Picrocrocin	C16H26O7	330.168		HMDB0005796	Organooxygen compounds
Strychnine	C21H22N2O2	334.168	Strychnine						map01063 Biosynthesis of alkaloids derived from shikimate pathway;map01110 Biosynthesis of secondary metabolites;
beta-Nicotinamide mononucleotide	C11H15N2O8P	334.057	Nicotinamide D-ribonucleotide	HMDB0000229	Pyridine nucleotides	3741	J9.877I	16171	map00760 Nicotinate and nicotinamide metabolism;map01100 Metabolic pathways;
Lathyrol	C20H30O4	334.214	Lathyrol
ent-16beta,17-dihydroxy-9(11)-kauren-19-oic acid
9,10-DHOME	C18H34O4	314.246	9,10-DHOME	HMDB0004704	Fatty Acyls	17395826	J1.376.220A	72663	map00591 Linoleic acid metabolism;
Platyphylline	C18H27NO5	337.189	Platyphylline
Nemorensine	C18H27NO5	337.189	Nemorensine
Sarracine	C18H27NO5	337.189	Sarracine
3alpha,6beta-Ditigloyloxytropan-7beta-ol
AICAR	C9H15N4O8P	338.063	1-(5'-Phosphoribosyl)-5-amino-4-imidazolecarboxamide	HMDB0001517	Imidazole ribonucleosides and ribonucleotides	7258	J7.665A	18406	map00230 Purine metabolism;map00340 Histidine metabolism;map01060 Biosynthesis of plant secondary metabolites;map01065 Biosynthesis of alkaloids derived from histidine and purine;map01100 Metabolic pathways;map01110 Biosynthesis of secondary metabolites;map04152 AMPK signaling pathway;
Wighteone	C20H18O5	338.115	Wighteone
8-Geranyloxypsoralen	C21H22O4	338.152		HMDB0039309	Coumarins and derivatives
Demethoxycurcumin	C20H18O5	338.115		HMDB0033801	Diarylheptanoids			65737
Bergamotine	C21H22O4	338.152		HMDB0033782	Coumarins and derivatives
Benzyl formate	C8H8O2	136.052	Benzylformate	HMDB0041485	Benzene and substituted derivatives	7933	J53.979A
4-Propylphenol	C9H12O	136.089	4-Propylphenol	HMDB0032625	Benzene and substituted derivatives	17395311	J13.769C
3-Carbamyl-1-methylpyridinium (1-Methylnicotinamide)
Myrcene	C10H16	136.125	Myrcene	HMDB0038169	Prenol lipids	8340	J2.010I	17221	map00902 Monoterpenoid biosynthesis;map01062 Biosynthesis of terpenoids and steroids;map01110 Biosynthesis of secondary metabolites;
3-Methylsalicylaldehyde	C8H8O2	136.052	3-Methylsalicylaldehyde						map00626 Naphthalene degradation;map01120 Microbial metabolism in diverse environments;map01220 Degradation of aromatic compounds;
Phenyl acetate	C8H8O2	136.052	Phenyl acetate	HMDB0040733	Phenol esters	17396575	J32.787E	8082
2-Methylbenzoic acid	C8H8O2	136.052	o-Toluate	HMDB0002340	Benzene and substituted derivatives	9424	J10.074I	36632	map00622 Xylene degradation;map01100 Metabolic pathways;map01120 Microbial metabolism in diverse environments;map01220 Degradation of aromatic compounds;
S-(Phenylacetothiohydroximoyl)-L-cysteine	C11H14N2O3S	254.072	S-(Phenylacetothiohydroximoyl)-L-cysteine						map00966 Glucosinolate biosynthesis;map01110 Biosynthesis of secondary metabolites;map01210 2-Oxocarboxylic acid metabolism;
7,8-Dihydroxyflavone
4',7-Dihydroxyflavone
Erucic acid	C22H42O2	338.318	Erucic acid	HMDB0002068	Fatty Acyls	10514	J10.102H	28792	map01040 Biosynthesis of unsaturated fatty acids;
5,6-DHET	C20H34O4	338.246	5,6-DHET	HMDB0002343	Fatty Acyls	17395770	J373.279G	63974	map00590 Arachidonic acid metabolism;map01100 Metabolic pathways;map04726 Serotonergic synapse;
Sterebin E	C20H34O4	338.246		HMDB0035379	Prenol lipids
8,9-DiHETrE	C20H34O4	338.246	8,9-DHET	HMDB0002311	Fatty Acyls	17395771	J472.252C	63970	map00590 Arachidonic acid metabolism;map01100 Metabolic pathways;map04726 Serotonergic synapse;
Galactinol	C12H22O11	342.116	alpha-D-Galactosyl-(1-&gt3)-1D-myo-inositol	HMDB0005826	Organooxygen compounds	4456	J475.283J	17505	map00052 Galactose metabolism;map01100 Metabolic pathways;
4',5,6,7-Tetramethoxyflavone;5,6,7-trimethoxy-2-(4-methoxyphenyl)chromen-4-one
1-O-Caffeoylglucose	C15H18O9	342.095	1-Caffeoyl-beta-D-glucose	HMDB0036937	Carbohydrates and carbohydrate conjugates	12618	J1.989.319G
beta-Lactose	C12H22O11	342.116	beta-Lactose	HMDB0041627	Carbohydrates and carbohydrate conjugates	5071	J223.917E	36218
Serpentine	C21H20N2O3	348.147	Serpentine						map00901 Indole alkaloid biosynthesis;map01110 Biosynthesis of secondary metabolites;
Chlorogenic acid	C16H18O9	354.095	Chlorogenate	HMDB0003164	Organooxygen compounds	4109	J108.009A	16112	map00940 Phenylpropanoid biosynthesis;map00941 Flavonoid biosynthesis;map00945 Stilbenoid, diarylheptanoid and gingerol biosynthesis;map01110 Biosynthesis of secondary metabolites;
Notopterol	C21H22O5	354.147	Notopterol
Scopolin	C16H18O9	354.095	Scopolin						map00940 Phenylpropanoid biosynthesis;map01061 Biosynthesis of phenylpropanoids;map01110 Biosynthesis of secondary metabolites;
Fucosterol	C29H48O	412.371	Fucosterol	HMDB0030021	Steroids and steroid derivatives	11010	J9.102B	27865	map01060 Biosynthesis of plant secondary metabolites;
Benzoic acid	C7H6O2	122.037	Aromatic acid	HMDB0001870	Benzene and substituted derivatives	3820	J2.358B	30746
Erythritol	C4H10O4	122.058	D-Threitol	HMDB0002994	Organooxygen compounds	96023387	J7.872G	48300
Nicotinamide	C6H6N2O	122.048	Nicotinamide	HMDB0001406	Pyridines and derivatives	3453	J3.988H	17154	map00760 Nicotinate and nicotinamide metabolism;map01100 Metabolic pathways;map04212 Longevity regulating pathway - worm;map04977 Vitamin digestion and absorption;
3-Ethylphenol	C8H10O	122.073	3-Ethylphenol	HMDB0059873	Phenols	17395386	J2.086I
Cannabinol	C21H26O2	310.193	Cannabinol
Tabernanthine	C20H26N2O	310.204	Tabernanthine
Astrocasine	C20H26N2O	310.204	Astrocasine
Moracin C	C19H18O4	310.121		HMDB0033310	2-arylbenzofuran flavonoids
Sterebin A	C18H30O4	310.214		HMDB0035337	Prenol lipids
9,10-Dihydroxystearate	C18H36O4	316.261	9,10-Dihydroxystearate						map00073 Cutin, suberine and wax biosynthesis;
2-Hydroxybutanoic acid	C4H8O3	104.047	2-Hydroxybutanoic acid	HMDB0000008	Hydroxy acids and derivatives	8262	J57.683B	1148	map00640 Propanoate metabolism;
4-Hydroxybutanoic acid	C4H8O3	104.047	4-Hydroxybutanoic acid	HMDB00710	Fatty Acyls				map00650 Butanoate metabolism;map00720 Carbon fixation pathways in prokaryotes;map01100 Metabolic pathways;map01120 Microbial metabolism in diverse environments;map01200 Carbon metabolism;
Maltotriose	C18H32O16	504.169	Maltotriose	HMDB0001262	Organooxygen compounds	4954	J208.710C	27931	map02010 ABC transporters;map04973 Carbohydrate digestion and absorption;
1-Kestose	C18H32O16	504.169	1F-beta-D-Fructosylsucrose	HMDB0011729	Organooxygen compounds	6439	J196.187J	16885
Physalin A	C28H30O10	526.184		HMDB0033773	Steroids and steroid derivatives
Physalin G	C28H30O10	526.184		HMDB0034340	Steroids and steroid derivatives
cis-Aconitic acid	C6H6O6	174.016	cis-Aconitate	HMDB0000072	Carboxylic acids and derivatives	3707	J37.488A	32805	map00020 Citrate cycle (TCA cycle);map00630 Glyoxylate and dicarboxylate metabolism;map00660 C5-Branched dibasic acid metabolism;map00720 Carbon fixation pathways in prokaryotes;map01060 Biosynthesis of plant secondary metabolites;map01061 Biosynthesis of phenylpropanoids;map01062 Biosynthesis of terpenoids and steroids;map01063 Biosynthesis of alkaloids derived from shikimate pathway;map01064 Bi…
Juglone	C10H6O3	174.032	Juglone	HMDB0030773	Naphthalenes	6579	J5.777K	15794
L-Theanine	C7H14N2O3	174.1	N5-Ethyl-L-glutamine	HMDB0034365	Carboxylic acids and derivatives	4289	J3.047C	17394
Gramine	C11H14N2	174.116	Gramine	HMDB35762	Indoles and derivatives
Traumatic acid	C12H20O4	228.136	Traumatic acid	HMDB0000933	Fatty Acyls	47205616	J5.789D	545687	map00592 alpha-Linolenic acid metabolism;map01110 Biosynthesis of secondary metabolites;
2'-Deoxyuridine;Deoxyuridine
Canthaxanthin	C40H52O2	564.397	Canthaxanthin	HMDB0003154	Prenol lipids	10776	J6.290A	3362	map00906 Carotenoid biosynthesis;map01110 Biosynthesis of secondary metabolites;
Mulberrofuran C	C34H28O9	580.173	Mulberrofuran C
Acanthoside B	C28H36O13	580.216	Acanthoside B
Karanjin
12-OPDA	C18H28O3	292.204	12-OPDA						map00592 alpha-Linolenic acid metabolism;map01100 Metabolic pathways;map01110 Biosynthesis of secondary metabolites;
Prostaglandin I2	C20H32O5	352.225	Prostaglandin I2	HMDB0001335	Fatty Acyls	4527	J17.550A	15552	map00590 Arachidonic acid metabolism;map01100 Metabolic pathways;map04024 cAMP signaling pathway;map04080 Neuroactive ligand-receptor interaction;map04270 Vascular smooth muscle contraction;map04370 VEGF signaling pathway;map04611 Platelet activation;
Lansiumarin A	C21H20O5	352.131		HMDB0034837	Coumarins and derivatives
(13E)-11a-Hydroxy-9,15-dioxoprost-13-enoic acid	C20H32O5	352.225	(13E)-11alpha-Hydroxy-9,15-dioxoprost-13-enoate	HMDB0001320	Fatty Acyls	7240	J363.760C	15548
4-O-alpha-D-Galactopyranuronosyl-D-galacturonic acid	C12H18O13	370.075	Digalacturonate	HMDB0039721	Organooxygen compounds	5333	J506.523B	33809	map00040 Pentose and glucuronate interconversions;map01100 Metabolic pathways;map02010 ABC transporters;
Thromboxane A2	C20H32O5	352.225	Thromboxane A2	HMDB0001452	Fatty Acyls	5266	J40.890E	15627	map00590 Arachidonic acid metabolism;map01100 Metabolic pathways;map04080 Neuroactive ligand-receptor interaction;map04611 Platelet activation;map04726 Serotonergic synapse;map07034 Eicosanoids;
Daphnoretin	C19H12O7	352.058	Daphnoretin
6-Ketoprostaglandin E1	C20H32O6	368.22	6-Keto-prostaglandin E1	HMDB0004241	Fatty Acyls	8246	J428.385F	28269	map00590 Arachidonic acid metabolism;map01100 Metabolic pathways;
20-COOH-Leukotriene B4	C20H30O6	366.204	20-COOH-Leukotriene B4	HMDB06059	Fatty Acyls				map00590 Arachidonic acid metabolism;
Geniposide	C17H24O10	388.137	Geniposide
L-Nicotine	C10H14N2	162.116	Nicotine	HMDB0001934	Pyridines and derivatives	4007	J9.266E	17688	map00960 Tropane, piperidine and pyridine alkaloid biosynthesis;map00980 Metabolism of xenobiotics by cytochrome P450;map01064 Biosynthesis of alkaloids derived from ornithine, lysine and nicotinic acid;map01110 Biosynthesis of secondary metabolites;map04714 Thermogenesis;map05033 Nicotine addiction;
Anabasine	C10H14N2	162.116	Anabasine	HMDB0004350		8431	J540.732J	28986	map00960 Tropane, piperidine and pyridine alkaloid biosynthesis;map01064 Biosynthesis of alkaloids derived from ornithine, lysine and nicotinic acid;map01110 Biosynthesis of secondary metabolites;
Safrole	C10H10O2	162.068	Safrole	HMDB0033591	Benzodioxoles	12673	J3.946B	8994
3-Hydroxycoumarin	C9H6O3	162.032		HMDB0002149	Coumarins and derivatives			349245
Allicin	C6H10OS2	162.017	Allicin	HMDB0033963	Thiosulfinic acid esters	9802	J71.032F	28411	map04750 Inflammatory mediator regulation of TRP channels;
4-Methoxycinnamaldehyde	C10H10O2	162.068	p-Methoxycinnamaldehyde	HMDB0032611	Cinnamaldehydes	12658	J199.786F
1-Octacosanol	C28H58O	410.449	Octacosan-1-ol	HMDB0034380	Fatty Acyls	10583	J10.708E	28243
alpha-Cyperone	C15H22O	218.167	alpha-Cyperone
Baldrinal	C12H10O4	218.058	Baldrinal
Astaxanthin	C40H52O4	596.387	Astaxanthin	HMDB0002204	Prenol lipids	10773	J11.883D	40968	map00906 Carotenoid biosynthesis;map01110 Biosynthesis of secondary metabolites;
Neohesperidin	C28H34O15	610.19	Neohesperidin	HMDB0030748	Flavonoids	11994	J15.272B	59016	map00941 Flavonoid biosynthesis;
Quercetin 3-O-neohesperidoside
Etoposide	C29H32O13	588.184	Etoposide	HMDB0014911	Lignan lactones	4733	J3.178J	4911	map04976 Bile secretion;
Fucoxanthin	C42H58O6	658.423	Fucoxanthin	HMDB0002741	Prenol lipids	10789	J221.693K	5186
Sucrose	C12H22O11	342.116	Sucrose	HMDB0000258	Organooxygen compounds	3389	J4.581K	17992	map00052 Galactose metabolism;map00500 Starch and sucrose metabolism;map01100 Metabolic pathways;map01110 Biosynthesis of secondary metabolites;map02010 ABC transporters;map02060 Phosphotransferase system (PTS);map04742 Taste transduction;map04973 Carbohydrate digestion and absorption;
Turanose	C12H22O11	342.116	Turanose	HMDB0011740	Fatty Acyls	124490288		32528
Lactulose	C12H22O11	342.116	Lactulose	HMDB0000740	Organooxygen compounds	9276	J86.091C	6359
(S)-10-Hydroxycamptothecin
Dephospho-CoA	C21H35N7O13P2S	687.149	Dephospho-CoA	HMDB0001373	Purine nucleotides	4138		15468	map00770 Pantothenate and CoA biosynthesis;map01100 Metabolic pathways;
Genipin	C11H14O5	226.084	Genipin	HMDB0035830	Prenol lipids	11968	J14.581E
3-Nitro-L-tyrosine
Deoxylapachol	C15H14O2	226.099	Deoxylapachol
Glycerophosphocholine	C8H20NO6P	257.103	sn-Glycero-3-phosphocholine	HMDB0000086	Glycerophospholipids	3939	J247.898F	16870	map00564 Glycerophospholipid metabolism;map00565 Ether lipid metabolism;map05231 Choline metabolism in cancer;
Acetamide	C2H5NO	59.0371	Acetamide	HMDB0031645	Carboximidic acids and derivatives	8483	J2.339F	27856
Glucose 1-phosphate	C6H13O9P	260.03	D-Glucose 1-phosphate	HMDB0001586	Organooxygen compounds	3403	J40.065C	16077	map00010 Glycolysis / Gluconeogenesis;map00040 Pentose and glucuronate interconversions;map00052 Galactose metabolism;map00500 Starch and sucrose metabolism;map00520 Amino sugar and nucleotide sugar metabolism;map00521 Streptomycin biosynthesis;map00523 Polyketide sugar unit biosynthesis;map00525 Acarbose and validamycin biosynthesis;map00561 Glycerolipid metabolism;map01060 Biosynthesis of plant…
Mannose 6-phosphate	C6H13O9P	260.03	D-Mannose 6-phosphate	HMDB0001078	Organooxygen compounds	3572	J817.412A	49728	map00051 Fructose and mannose metabolism;map00520 Amino sugar and nucleotide sugar metabolism;map01100 Metabolic pathways;map01110 Biosynthesis of secondary metabolites;map02060 Phosphotransferase system (PTS);map04142 Lysosome;
Knightinol	C17H23NO3	289.168	Knightinol
Bromocriptine	C32H40BrN5O5	653.221	Bromocriptine	HMDB0015331	Ergoline and derivatives	9074	J16.988I	3181
Cineole	C10H18O	154.136	1,8-Cineole	HMDB0004472	Oxanes	12031	J3.281F	584235	map00902 Monoterpenoid biosynthesis;map01110 Biosynthesis of secondary metabolites;map04750 Inflammatory mediator regulation of TRP channels;
Trifolirhizin	C22H22O10	446.121	Trifolirhizin	HMDB0036630	Isoflavonoids	12721	J20.549D		map00943 Isoflavonoid biosynthesis;
Baicalin	C21H18O11	446.085	Baicalin	HMDB0041832	Flavonoids	12211	J94.473D	2981
(S)-(-)-Perillyl alcohol	C10H16O	152.12	Perillyl alcohol	HMDB0003634	Prenol lipids	5472	J86.014J	15420	map00902 Monoterpenoid biosynthesis;map00903 Limonene and pinene degradation;map01110 Biosynthesis of secondary metabolites;
Cinnamyl alcohol	C9H10O	134.073	Cinnamyl alcohol	HMDB0029697	Cinnamyl alcohols	5428	J106.769I	17177	map01060 Biosynthesis of plant secondary metabolites;map01110 Biosynthesis of secondary metabolites;
N,N'-diacetylchitobiose	C16H28N2O11	424.169	Chitobiose	HMDB0062702	Organooxygen compounds	4818	J392.525K	28681	map00520 Amino sugar and nucleotide sugar metabolism;map01100 Metabolic pathways;map02010 ABC transporters;map02060 Phosphotransferase system (PTS);
Eprosartan	C23H24N2O4S	424.146	Eprosartan	HMDB0015014	Benzene and substituted derivatives	9670	J380.264G	4814
Beta-mangostin	C25H28O6	424.189		HMDB0036596	Benzopyrans
(+)-Glaucarubinone
Alpha-Santonin	C15H18O3	246.126	alpha-Santonin
Ellipticine	C14H12O7	292.058		HMDB0034310	Vinylogous acids
Decursinol	C14H14O4	246.089	Decursinol
Deoxyelephantopin	C19H20O6	344.126	Deoxyelephantopin
3-Galloylquinic acid
Diosbulbin D	C19H20O6	344.126		HMDB0035109	Naphthopyrans
Chamazulene	C14H16	184.125	Chamazulene	HMDB0036470	Prenol lipids	11823	J9.436F
cis-3-(Carboxy-ethyl)-3,5-cyclo-hexadiene-1,2-diol	C9H12O4	184.074	cis-3-(Carboxy-ethyl)-3,5-cyclo-hexadiene-1,2-diol						map00360 Phenylalanine metabolism;map01100 Metabolic pathways;map01120 Microbial metabolism in diverse environments;map01220 Degradation of aromatic compounds;
Atropaldehyde	C9H8O	132.058	Atropaldehyde	HMDB0060671	Benzene and substituted derivatives	51090919	J337.792J		map00982 Drug metabolism - cytochrome P450;
Abyssinone V	C25H28O5	408.194	Abyssinone V
Nodakenin	C20H24O9	408.142	Nodakenin
Torachrysone 8-O-glucoside
9-Hydroxycalabaxanthone	C24H24O6	408.157		HMDB0031920	Benzopyrans
Ginkgolide C	C20H24O11	440.132	Ginkgolide C	HMDB0036860	Prenol lipids	9805	J39.136K
Azadirachtin	C35H44O16	720.263	Azadirachtin						map01062 Biosynthesis of terpenoids and steroids;
dUMP	C9H13N2O8P	308.041	dUMP	HMDB0001409	Pyrimidine nucleotides	3656	J298.569A	17622	map00240 Pyrimidine metabolism;map01100 Metabolic pathways;map01523 Antifolate resistance;
Capsanthin	C40H56O3	584.423	Capsanthin	HMDB0036590	Prenol lipids	10777	J5.891B	3375	map00906 Carotenoid biosynthesis;
Lutein	C40H56O2	568.428	Lutein	HMDB0003233	Prenol lipids	10794	J5.394E	28838	map00906 Carotenoid biosynthesis;map01062 Biosynthesis of terpenoids and steroids;map01100 Metabolic pathways;map01110 Biosynthesis of secondary metabolites;
Vitamin A2 aldehyde	C20H26O	282.198	all-trans-Dehydroretinal	HMDB0035695	Prenol lipids	8206	J12.671C	28537
Pseudobaptigenin	C16H10O5	282.053	Pseudobaptigenin	HMDB0036616	Isoflavonoids	12705	J10.602J	8602	map00943 Isoflavonoid biosynthesis;map01110 Biosynthesis of secondary metabolites;
Artemisinin	C15H22O5	282.147	Artemisinin
Miltirone	C19H22O2	282.162	Miltirone	HMDB0035080	Prenol lipids	586304	J17.268E
Octyl Gallate	C15H22O5	282.147		HMDB0033375	Benzene and substituted derivatives			83631
Isoalantolactone	C15H20O2	232.146	Isoalantolactone	HMDB0035934	Prenol lipids	11675	J12.027H
Encecalin	C14H16O3	232.11	Encecalin
Aloperine	C15H24N2	232.194	Aloperine
Melatonin	C13H16N2O2	232.121	Melatonin	HMDB0001389	Indoles and derivatives	4752	J5.258B	16796	map00380 Tryptophan metabolism;map01100 Metabolic pathways;map04080 Neuroactive ligand-receptor interaction;map04713 Circadian entrainment;
(2S,3R,4E)-2-Amino-4-heptadecene-1,3-diol
Schisantherin B	C28H34O9	514.22	Schisantherin B
Solasodine	C27H43NO2	413.329	Solasodine	HMDB0035282	Steroids and steroid derivatives	13005	J59.535G	565242	map01066 Biosynthesis of alkaloids derived from terpenoid and polyketide;
Corticosterone	C21H30O4	346.214	Corticosterone	HMDB0001547	Steroids and steroid derivatives	5219	J5.239F	16827	map00140 Steroid hormone biosynthesis;map01100 Metabolic pathways;map04923 Regulation of lipolysis in adipocytes;map04925 Aldosterone synthesis and secretion;map05020 Prion diseases;
Calycanthine	C22H26N4	346.216	Calycanthine	HMDB0029561	Quinolines and derivatives	12756	J17.151D	3333
Stachyose	C24H42O21	666.222	Stachyose	HMDB0003553	Organooxygen compounds	4765	J5.938B	17164	map00052 Galactose metabolism;map01100 Metabolic pathways;
Nandrolone	C18H26O2	274.193	Nandrolone	HMDB0002725	Steroids and steroid derivatives	9463	J5.731B	7466
Bellidifolin	C14H10O6	274.048	Bellidifolin
1,3,6-Trihydroxy-5-methoxyxanthone	C14H10O6	274.048		HMDB0041243	Benzopyrans
Metanephrine	C10H15NO3	197.105	L-Metanephrine	HMDB0004063	Phenols	7913	J363.335G	144365	map00350 Tyrosine metabolism;map01100 Metabolic pathways;
Alliin	C6H11NO3S	177.046	Alliin	HMDB0033592	Carboxylic acids and derivatives	10464	J13.586K
p-Cresol	C7H8O	108.058	4-Cresol	HMDB0001858	Phenols	4643	J1.185A	17847	map00623 Toluene degradation;map00633 Nitrotoluene degradation;map01100 Metabolic pathways;map01120 Microbial metabolism in diverse environments;map01220 Degradation of aromatic compounds;map04974 Protein digestion and absorption;
(-)-Salsoline	C11H15NO2	193.11	(-)-Salsoline	HMDB0012469	Tetrahydroisoquinolines	11830	J4.300A	761542
DG(16:0/16:0/0:0)	C35H68O5	568.507	Diacylglycerol	HMDB0007098	Glycerolipids	3465		237189	map01521 EGFR tyrosine kinase inhibitor resistance;map04010 MAPK signaling pathway;map04012 ErbB signaling pathway;map04014 Ras signaling pathway;map04015 Rap1 signaling pathway;map04020 Calcium signaling pathway;map04024 cAMP signaling pathway;map04062 Chemokine signaling pathway;map04064 NF-kappa B signaling pathway;map04066 HIF-1 signaling pathway;map04071 Sphingolipid signaling pathway;map040…
Streptozotocin	C8H15N3O7	265.091	Streptozocin	HMDB0014572	Organooxygen compounds	9521	J2.751K	9288
(-)-Anonaine
Ferulic acid; Trans-Ferulic acid;trans-Ferulic acid
L-Quebrachitol	C7H14O6	194.079	(-)-Quebrachitol	HMDB0034221	Organooxygen compounds	10456	J16.953F	111
D-Pinitol	C7H14O6	194.079	D-Pinitol	HMDB0034222	Organooxygen compounds	6581	J14.856C	28548
3-Hydroxy-4-methoxycinnamic acid;Isoferulic acid
Kakuol	C10H10O4	194.058	Kakuol
Butyl 4-Hydroxybenzoate	C11H14O3	194.094		HMDB0032575	Benzene and substituted derivatives
(-)-alpha-Narcotine	C22H23NO7	413.147	alpha-Narcotine	HMDB0033439	Phthalide isoquinolines	11783	J9.283E	73237	map00950 Isoquinoline alkaloid biosynthesis;map01110 Biosynthesis of secondary metabolites;
Pipermethystine	C16H17NO4	287.116		HMDB0033486	Pyridines and derivatives
Pectolinarin
Isotetrandrine	C38H42N2O6	622.304	Isotetrandrine	HMDB0030174	Isoquinolines and derivatives	96023538	J6.584F	397244
Cycleanine	C38H42N2O6	622.304	Cycleanine
Mangiferin	C19H18O11	422.085	Mangiferin	HMDB0034410	Benzopyrans	12263	J15.735J	6682
Lamiide	C17H26O12	422.142	Lamiide
Lucidadiol	C30H48O3	456.36		HMDB0040455	Prenol lipids
Deguelin	C23H22O6	394.142	Deguelin
Kazinol A	C25H30O4	394.214	Kazinol A
Rotenone	C23H22O6	394.142	Rotenone	HMDB0034436	Isoflavonoids	9795	J108.000H	28201	map00943 Isoflavonoid biosynthesis;map01061 Biosynthesis of phenylpropanoids;map01110 Biosynthesis of secondary metabolites;map05012 Parkinson disease;
Inositol	C6H12O6	180.063	myo-Inositol	HMDB0000211	Organooxygen compounds	3437	J4.282J	17268	map00052 Galactose metabolism;map00053 Ascorbate and aldarate metabolism;map00521 Streptomycin biosynthesis;map00562 Inositol phosphate metabolism;map01100 Metabolic pathways;map01110 Biosynthesis of secondary metabolites;map01120 Microbial metabolism in diverse environments;map02010 ABC transporters;map04070 Phosphatidylinositol signaling system;
Coniferyl alcohol	C10H12O3	180.079	Coniferyl alcohol	HMDB0012915	Phenols	3869	J5.761D	17745	map00940 Phenylpropanoid biosynthesis;map00998 Biosynthesis of various secondary metabolites - part 2;map01061 Biosynthesis of phenylpropanoids;map01100 Metabolic pathways;map01110 Biosynthesis of secondary metabolites;
2-Hydroxy-3-(4-hydroxyphenyl)propenoic acid	C9H8O4	180.042	2-Hydroxy-3-(4-hydroxyphenyl)propenoate	HMDB0006915	Benzene and substituted derivatives	7728	J898.634G	27683	map00350 Tyrosine metabolism;map01100 Metabolic pathways;
4-Hydroxy-3-methoxymandelate;Vanillylmandelic acid
Neosperidin dihydrochalcone
Glutathione oxidized
Hydroxysafflor yellow A	C27H32O16	612.169		HMDB0040677	Cinnamic acids and derivatives
Quercitrin	C21H20O11	448.101	Quercitrin	HMDB0033751	Flavonoids	4883	J1.578D	17558	map00944 Flavone and flavonol biosynthesis;
Dictamnine	C12H9NO2	199.063	Dictamnine						map01063 Biosynthesis of alkaloids derived from shikimate pathway;
Methylecgonine
Tussilagine	C10H17NO3	199.121	Tussilagine
Cevadine
18alpha-Glycyrrhetinic acid
Glycyrrhetinic acid	C30H46O4	470.34	Glycyrrhetinate	HMDB0011628	Prenol lipids	5340	J298.634E	30853
Ganoderic acid Jb
3-Oxopomolic acid
Withanolide A	C28H38O6	470.267		HMDB0034415	Steroids and steroid derivatives
11-Keto-beta-boswellic acid	C30H46O4	470.34		HMDB0036671	Prenol lipids
Ganoderic acid F	C32H42O9	570.283		HMDB0035988	Prenol lipids
Yohimbic acid monohydrate
Esculin	C15H16O9	340.079	Esculin	HMDB0030820	Coumarins and derivatives	11455	J6.981G	338261
Desmethylxanthohumol	C20H20O5	340.131	Desmethylxanthohumol	HMDB0030610	Linear 1,3-diarylpropanoids	47205714	J1.068.808F	588051	map00941 Flavonoid biosynthesis;
Broussonin C	C20H24O3	312.173	Broussonin C
4'-Prenyloxyresveratrol	C19H20O4	312.136	4'-Prenyloxyresveratrol	HMDB35478	Stilbenes
2-Hydroxy-6-oxo-6-(2-carboxyphenyl)-hexa-2,4-dienoate	C13H10O6	262.048	2-Hydroxy-6-oxo-6-(2-carboxyphenyl)-hexa-2,4-dienoate						map00624 Polycyclic aromatic hydrocarbon degradation;map01100 Metabolic pathways;map01120 Microbial metabolism in diverse environments;
Pristimerin	C30H40O4	464.293	Pristimerin
D-Aspartic acid	C4H7NO4	133.038	D-Aspartate	HMDB0006483	Carboxylic acids and derivatives	3692	J9.205C	17364	map00250 Alanine, aspartate and glutamate metabolism;map01100 Metabolic pathways;
indolin-2-one	C8H7NO	133.053	Indolin-2-one						map00402 Benzoxazinoid biosynthesis;map01110 Biosynthesis of secondary metabolites;
Cephalotaxine	C18H21NO4	315.147	Cephalotaxine
Chelidonine	C20H19NO5	353.126	Chelidonine
Rosmarinine	C18H27NO6	353.184	Rosmarinine
Protopine	C20H19NO5	353.126	Protopine	HMDB0003920	Protopine alkaloids	7594	J40.085H	16415	map00950 Isoquinoline alkaloid biosynthesis;map01063 Biosynthesis of alkaloids derived from shikimate pathway;map01100 Metabolic pathways;map01110 Biosynthesis of secondary metabolites;
Boldine	C19H21NO4	327.147	Boldine	HMDB39085	Aporphines
Linarin
Scoparone	C11H10O4	206.058	Scoparone	HMDB0030818	Coumarins and derivatives	11502	J5.319H	284936
alpha-Irone	C14H22O	206.167	alpha-Irone	HMDB0035631	Prenol lipids	11880	J4.239K	10284
3-Methoxy-4,5-methylenedioxycinnamaldehyde	C11H10O4	206.058		HMDB0035303	Benzodioxoles
Securinine	C13H15NO2	217.11	Securinine
Dihydrocapsaicin	C18H29NO3	307.215	Dihydrocapsaicin	HMDB0038457	Benzene and substituted derivatives	96023439	J126.282C	46932
Narciclasine	C14H13NO7	307.069	Narciclasine
Isatidine	C18H25NO7	367.163	Isatidine
(+)-Corynoline
DL-alpha-Tocopherylacetate
3,4-Dihydroxyphenylglycol	C8H10O4	170.058	3,4-Dihydroxyphenylethyleneglycol	HMDB0000318	Phenols	7902	J45.947J	1387	map00350 Tyrosine metabolism;map01100 Metabolic pathways;
3-Hydroxyphenylacetic acid	C8H8O3	152.047	3-Hydroxyphenylacetate	HMDB0000440	Phenols	7917	J3.004J	17445	map00350 Tyrosine metabolism;map00360 Phenylalanine metabolism;map00643 Styrene degradation;map01100 Metabolic pathways;map01120 Microbial metabolism in diverse environments;
Vanillin	C8H8O3	152.047	4-Hydroxy-3-methoxy-benzaldehyde	HMDB0012308	Phenols	4017	J2.923H	18346	map00627 Aminobenzoate degradation;map00998 Biosynthesis of various secondary metabolites - part 2;map01061 Biosynthesis of phenylpropanoids;map01063 Biosynthesis of alkaloids derived from shikimate pathway;map01100 Metabolic pathways;map01110 Biosynthesis of secondary metabolites;map01120 Microbial metabolism in diverse environments;
(+)-Pteryxin
Cleomiscosin A	C20H18O8	386.1	Cleomiscosin A
Pinoresinol dimethyl ether	C22H26O6	386.173	Pinoresinol dimethyl ether
trans-Hinokiresinol
Morusin	C25H24O6	420.157	Morusin	HMDB0036631	Flavonoids	12292	J94.468H	7005
Eucannabinolide
7-Hydroxyflavone	C15H10O3	238.063	7-Hydroxyflavone
Bisabolol oxide A	C15H26O2	238.193	Bisabolol oxide A	HMDB38196	Oxanes
Cheilanthifoline
Cassythicine	C19H19NO4	325.131	(+)-Cassythicine	HMDB0033354	Aporphines	11580	J666.098C
Pyrrolidonecarboxylic acid	C5H7NO3	129.043	5-Oxo-D-proline	HMDB0000805	Carboxylic acids and derivatives	5301	J53.019K	16010	map00471 D-Glutamine and D-glutamate metabolism;map01100 Metabolic pathways;
Lincomycin	C18H34N2O6S	406.214	Lincomycin	HMDB0015564	Carboxylic acids and derivatives	9031	J22.137F	6472
Lancerin	C19H18O10	406.09	Lancerin
Morroniside	C17H26O11	406.147	Morroniside
Safflor Yellow A	C27H30O15	594.158		HMDB0029537	Cinnamic acids and derivatives
Lonicerin	C27H30O14	578.164	Scolymoside	HMDB0005799	Flavonoids	583020	J567.144B		map00944 Flavone and flavonol biosynthesis;
Poncirin	C28H34O14	594.195	Poncirin	HMDB0037487	Flavonoids	12018	J241.355H
Pelargonidin-3,5-O-diglucoside chloride
Convallatoxin	C29H42O10	550.278		HMDB0034362	Steroids and steroid derivatives
Ganoderic acid H	C32H44O9	572.299		HMDB0035987	Prenol lipids
Lactupicrin	C23H22O7	410.137	Lactupicrin	HMDB0035828	Prenol lipids	11681	J1.583.455B
3-Isomangostin	C24H26O6	410.173		HMDB0041521	Benzopyrans
Desoxypeganine
Calystegine B2	C7H13NO4	175.084	Calystegin B2	HMDB0038594	Tropane alkaloids	13034	J657.463G
Nobiletin	C21H22O8	402.131	Nobiletin	HMDB0029540	Flavonoids	12298	J12.548B	221290
Tetrahydrocurcumin	C21H24O6	372.157		HMDB0005789	Diarylheptanoids			67263
Veraguensin
Syringin	C17H24O9	372.142	Syringin						map00940 Phenylpropanoid biosynthesis;
Loganin	C17H26O10	390.153	Loganin						map00902 Monoterpenoid biosynthesis;map01062 Biosynthesis of terpenoids and steroids;map01100 Metabolic pathways;map01110 Biosynthesis of secondary metabolites;
Curcumin	C21H20O6	368.126	Curcumin	HMDB0002269	Diarylheptanoids	12626	J5.762B	3962	map00945 Stilbenoid, diarylheptanoid and gingerol biosynthesis;map01110 Biosynthesis of secondary metabolites;
Mitraphylline	C21H24N2O4	368.174	Mitraphylline
C-Veratroylglycol	C10H12O5	212.068		HMDB0041286	Organooxygen compounds
Plumieride	C21H26O12	470.142	Plumieride
Geniposidic acid;Geniposidic acid
Isodiospyrin	C24H28O4	380.199		HMDB0034225	Dihydrofurans
Methyl rosmarinate	C19H18O8	374.1		HMDB0035446	Cinnamic acids and derivatives
Apiin	C26H28O14	564.148	Apigenin 7-O-[beta-D-apiosyl-(1-&gt2)-beta-D-glucoside]	HMDB0030843	Flavonoids	7413	J41.409C	15932	map00944 Flavone and flavonol biosynthesis;
Glucofrangulin B	C26H28O14	564.148	Glucofrangulin B
Bufotaline
Cholesterol	C27H46O	386.355	Cholesterol	HMDB0000067	Steroids and steroid derivatives	3487	J2.804E	16113	map00100 Steroid biosynthesis;map00120 Primary bile acid biosynthesis;map00140 Steroid hormone biosynthesis;map00981 Insect hormone biosynthesis;map00984 Steroid degradation;map01066 Biosynthesis of alkaloids derived from terpenoid and polyketide;map01100 Metabolic pathways;map01120 Microbial metabolism in diverse environments;map04913 Ovarian steroidogenesis;map04925 Aldosterone synthesis and se…
Lathosterol	C27H46O	386.355	Lathosterol	HMDB0001170	Steroids and steroid derivatives	4415	J9.827B	17168	map00100 Steroid biosynthesis;map01100 Metabolic pathways;map01110 Biosynthesis of secondary metabolites;
Dihydrozeatin	C10H15N5O	221.128	Dihydrozeatin	HMDB0012215	Imidazopyrimidines	5123	J20.658J	17874	map00908 Zeatin biosynthesis;map01110 Biosynthesis of secondary metabolites;map04075 Plant hormone signal transduction;
Mevastatin	C23H34O5	390.241	Mevastatin						map07024 HMG-CoA reductase inhibitors;
Lubiprostone	C20H32F2O5	390.222	RU-0211	HMDB0015180	Fatty Acyls	586296	J2.581.749D	34945
Styrene Oxide	C8H8O	120.058	Styrene oxide	HMDB0062765	Benzene and substituted derivatives	5168	J5.159D	17907
Hydroxypropanedioic acid	C3H4O5	120.006	Hydroxymalonate	HMDB0035227	Carboxylic acids and derivatives	5343	J4.253F	16513
1,2,4-Trimethylbenzene	C9H12	120.094	1,2,4-Trimethylbenzene	HMDB0013733	Benzene and substituted derivatives	17395533	J3.567J	34039
Salsolinol	C10H13NO2	179.095	(-)-Salsolinol	HMDB0042012	Tetrahydroisoquinolines	11832	J21.391H	113	map01063 Biosynthesis of alkaloids derived from shikimate pathway;
Isoxanthopterin	C6H5N5O2	179.044	Isoxanthopterin	HMDB0000704	Pteridines and derivatives	6694	J102.690I	16713
Glucosamine	C6H13NO5	179.079	D-Glucosamine	HMDB0001514	Organooxygen compounds	3623	J10.582A	47977	map00520 Amino sugar and nucleotide sugar metabolism;map01100 Metabolic pathways;map02060 Phosphotransferase system (PTS);
Fingolimod hydrochloride
N1-(alpha-D-ribosyl)-5,6-dimethyl-benzimidazole	C14H18N2O4	278.127	alpha-Ribazole	HMDB0011112	Benzimidazole ribonucleosides and ribonucleotides	8070	J10.013G	10329	map00860 Porphyrin and chlorophyll metabolism;map01100 Metabolic pathways;
Isovitexin	C21H20O10	432.106	Isovitexin						map00944 Flavone and flavonol biosynthesis;
Schisandrol A
Afzelin;Kaempferol 3-O-rhamnoside (Kaempferin)
Campesterol	C28H48O	400.371	Campesterol	HMDB0002869	Steroids and steroid derivatives	4917	J5.962E	28623	map00100 Steroid biosynthesis;map00905 Brassinosteroid biosynthesis;map01060 Biosynthesis of plant secondary metabolites;map01062 Biosynthesis of terpenoids and steroids;map01070 Biosynthesis of plant hormones;map01100 Metabolic pathways;map01110 Biosynthesis of secondary metabolites;
2-Aminomuconate semialdehyde	C6H7NO3	141.043	2-Aminomuconate semialdehyde	HMDB0001280	Carboxylic acids and derivatives	6567	J1.127.187A	15745	map00380 Tryptophan metabolism;map00627 Aminobenzoate degradation;map01100 Metabolic pathways;map01120 Microbial metabolism in diverse environments;
L-Hypoglycin A	C7H11NO2	141.079	Hypoglycin	HMDB0029427	Carboxylic acids and derivatives	10485	J85.271F
Procyanidin B4	C30H26O12	578.142	Procyanidin B4	HMDB13690	Flavonoids
Isochamaejasmine
Hinokiflavone	C30H18O10	538.09	Hinokiflavone
Cupressuflavone	C30H18O10	538.09	Cupressuflavone
3,8'-Biapigenin
Lithospermic acid	C27H22O12	538.111	Lithospermic acid
Sciadopitysin	C32H22O10	566.121		HMDB0033937	Flavonoids			79087
Rapanone	C19H30O4	322.214	Rapanone
Zeranol	C18H26O5	322.178	alpha-Zearalanol	HMDB0032702	Macrolides and analogues	17395750	J10.434E
Isoscoparin	C22H22O11	462.116	Isoscoparin
Swertiajaponin	C22H22O11	462.116	Swertiajaponin	HMDB0030569	Flavonoids	12373	J15.605A
Peonidin-3-glucoside	C22H23O11	463.124	Peonidin 3-O-glucoside	HMDB0013689	Flavonoids	14288	J291.386K	74793	map00942 Anthocyanin biosynthesis;
g-Strophanthin	C29H44O12	584.283	G-Strophanthin	HMDB15224	Benzene and substituted derivatives				map04976 Bile secretion;
Quercetin-3-O-sophoroside
Myricitrin;Myricetin 3-O-rhamnoside (Myricitrin)
Isoliquiritin; Isoliquiritoside
Liquiritin	C21H22O9	418.126	Liquiritin	HMDB0029520	Flavonoids	96023475	J22.605J
Ethyl 3,4,5-trimethoxybenzoate	C12H16O5	240.1		HMDB0038627	Benzene and substituted derivatives
Salannin	C34H44O9	596.298	Salannin
Methyl hesperidin	C29H36O15	624.205	Methyl hesperidin
Isorhamnetin-3-O-neohespeidoside
Grossamide	C36H36N2O8	624.247		HMDB0040370	2-arylbenzofuran flavonoids
Plantagoside	C21H22O12	466.111	Plantagoside
Agnuside	C22H26O11	466.148		HMDB0036561	Prenol lipids
Stigmasterol	C29H48O	412.371	Stigmasterol	HMDB0000937	Steroids and steroid derivatives	7804	J4.635C	28824	map00100 Steroid biosynthesis;map01060 Biosynthesis of plant secondary metabolites;map01062 Biosynthesis of terpenoids and steroids;map01110 Biosynthesis of secondary metabolites;
alpha-Spinasterol	C29H48O	412.371	alpha-Spinasterol	HMDB0033873	Steroids and steroid derivatives	11033	J389.542D
Curcumenone	C15H22O2	234.162	Curcumenone	HMDB0033253	Prenol lipids	96023838	J442.337B
Valerenic acid	C15H22O2	234.162	Valerenic acid	HMDB0030016	Prenol lipids	11931	J14.796F
Benzoylagmatine	C12H18N4O	234.148	Benzoylagmatine
Bakkenolide A	C15H22O2	234.162	Bakkenolide A
1'-Acetoxychavicol acetate	C13H14O4	234.089	1'-Acetoxychavicol acetate	HMDB0041006	Benzene and substituted derivatives	12611	J553.238H	469
Angustifoline	C14H22N2O	234.173	Angustifoline
N-p-Coumaroyl putrescine
beta-Costic acid	C15H22O2	234.162		HMDB0035794	Prenol lipids
Sclareol	C20H36O2	308.272	Sclareol	HMDB0036827	Prenol lipids	11375	J13.989K	9053	map00904 Diterpenoid biosynthesis;map01110 Biosynthesis of secondary metabolites;
12-O-tetradecanoylphorbol-13-acetate
Dexamethasone	C22H29FO5	392.2	Dexamethasone	HMDB0015364	Steroids and steroid derivatives	17396633	J1.356K	41879
Mulberrofuran A	C25H28O4	392.199	Mulberrofuran A	HMDB0033656	2-arylbenzofuran flavonoids	11039	J2.767.222A
Calenduloside E	C36H56O9	632.392	Oleanoic acid 3-O-glucuronide	HMDB0040851	Prenol lipids	11156	J70.011H
Momordicoside G	C37H60O8	632.429		HMDB0035821	Steroids and steroid derivatives
Dipterocarpol	C30H50O2	442.381	Dipterocarpol
Vanillic acid	C8H8O4	168.042	Vanillate	HMDB0000484	Benzene and substituted derivatives	8897	J5.337F	30816	map00627 Aminobenzoate degradation;map01120 Microbial metabolism in diverse environments;
Coproporphyrin III	C36H38N4O8	654.269	Coproporphyrin III	HMDB0000570	Tetrapyrroles and derivatives	8065	J14.910A	27609	map00860 Porphyrin and chlorophyll metabolism;map01100 Metabolic pathways;map01110 Biosynthesis of secondary metabolites;
Gemcitabine	C9H11F2N3O4	263.072	Gemcitabine	HMDB0014584	Pyrimidine nucleosides	9852	J357.909C	175901
Taurolithocholate	C26H45NO5S	483.302	Taurolithocholate	HMDB0000722	Steroids and steroid derivatives	5584	J337.752K	36259
p-Hydroxyphenylacetylglycine	C10H11NO4	209.069	p-Hydroxyphenylacetylglycine	HMDB00735	Carboxylic acids and derivatives				map00350 Tyrosine metabolism;
cis-2-Methylaconitate	C7H8O6	188.032	(Z)-But-2-ene-1,2,3-tricarboxylate	HMDB0006357	Carboxylic acids and derivatives	6896	J678.271J	16717	map00640 Propanoate metabolism;map01100 Metabolic pathways;
2,6-Dimethyl-7-octene-2,3,6-triol	C10H20O3	188.141		HMDB0038186	Fatty Acyls
Pseudouridine 5'-phosphate	C9H13N2O9P	324.036	Pseudouridine 5'-phosphate	HMDB0001271	Organooxygen compounds	4395	J2.731.765K	18116	map00240 Pyrimidine metabolism;map01100 Metabolic pathways;
3-Methoxy-4-hydroxyphenylglycolaldehyde	C9H10O4	182.058	3-Methoxy-4-hydroxyphenylglycolaldehyde	HMDB0004061	Phenols	7909	J2.370.679B		map00350 Tyrosine metabolism;map01100 Metabolic pathways;
3-(2,3-Dihydroxyphenyl)propanoate	C9H10O4	182.058	3-(2,3-Dihydroxyphenyl)propanoate						map00360 Phenylalanine metabolism;map01100 Metabolic pathways;map01120 Microbial metabolism in diverse environments;map01220 Degradation of aromatic compounds;
Dihydroconiferyl alcohol	C10H14O3	182.094	Dihydroconiferyl alcohol
2'-O-Methyladenosine	C11H15N5O4	281.112	rRNA containing a single residue of 2'-O-methyladenosine	HMDB0004326	Purine nucleosides	7343		119928
4-Hydroxyphenylacetylglutamic acid	C13H15NO6	281.09	4-Hydroxyphenylacetylglutamic acid	HMDB0006061		7919	J2.756.599I		map00350 Tyrosine metabolism;
Methoxyindoleacetic acid	C11H11NO3	205.074	5-Methoxyindoleacetate	HMDB0004096	Indoles and derivatives	7971	J139.625K	28281	map00380 Tryptophan metabolism;
Bellendine	C12H15NO2	205.11	Bellendine
Beta-D-Fructose 2-phosphate	C6H13O9P	260.03	beta-D-Fructose 2-phosphate	HMDB0006800	Organooxygen compounds	6130	J2.741.446J	12350	map00051 Fructose and mannose metabolism;map01100 Metabolic pathways;
Desmethylbellidifolin
N-D-Glucosylarylamine	C12H17NO5	255.111	N-D-Glucosylarylamine
Nantenine	C20H21NO4	339.147	Nantenine
8-Azabicyclo-3.2.1-octan-3-ol
Dulcoside A	C38H60O17	788.383		HMDB0036708	Prenol lipids
gamma-Hydroxy-3-pyridinebutanoate	C9H11NO3	181.074	gamma-Hydroxy-3-pyridinebutanoate	HMDB01119	Pyridines and derivatives				map00980 Metabolism of xenobiotics by cytochrome P450;map05204 Chemical carcinogenesis;
Beta-Tyrosine	C9H11NO3	181.074	3-Amino-3-(4-hydroxyphenyl)propanoate	HMDB0003831	Carboxylic acids and derivatives	7012	J2.370.463C	16939	map00350 Tyrosine metabolism;
p-Octopamine	C8H11NO2	153.079	Octopamine	HMDB0004825	Phenols	6898	J5.024E	44715	map04080 Neuroactive ligand-receptor interaction;
Terpinine-4-ol
Atherosperminine	C20H23NO2	309.173		HMDB0030304	6,6a-secoaporphines			760438
Cortolone-3-glucuronide	C27H42O11	542.273		HMDB0010320	Steroids and steroid derivatives			88773
Palmitic acid	C16H32O2	256.24	Hexadecanoic acid	HMDB0000220	Fatty Acyls	3548	J1.378A	15756	map00061 Fatty acid biosynthesis;map00062 Fatty acid elongation;map00071 Fatty acid degradation;map00073 Cutin, suberine and wax biosynthesis;map01040 Biosynthesis of unsaturated fatty acids;map01060 Biosynthesis of plant secondary metabolites;map01100 Metabolic pathways;map01212 Fatty acid metabolism;
Liquiritigenin	C15H12O4	256.074	Liquiritigenin	HMDB29519	Flavonoids				map00941 Flavonoid biosynthesis;map00943 Isoflavonoid biosynthesis;map01061 Biosynthesis of phenylpropanoids;map01110 Biosynthesis of secondary metabolites;
1-(beta-D-Ribofuranosyl)-1,4-dihydronicotinamide	C11H16N2O5	256.106	1-(beta-D-Ribofuranosyl)-1,4-dihydronicotinamide	HMDB11648	Organooxygen compounds
3,9-Dihydroxypterocarpan	C15H12O4	256.074	3,9-Dihydroxypterocarpan						map00943 Isoflavonoid biosynthesis;map01110 Biosynthesis of secondary metabolites;
Huperzine B	C16H20N2O	256.158	Huperzine B
Hydrangenol	C15H12O4	256.074	Hydrangenol
1-(alpha-Methyl-4-(2-methylpropyl)benzeneacetate)-beta-D-Glucopyranuronic acid	C19H26O8	382.163	beta-D-Glucuronoside	HMDB0010343	Organooxygen compounds	5938		88735	map00040 Pentose and glucuronate interconversions;map00053 Ascorbate and aldarate metabolism;map01100 Metabolic pathways;map01240 Biosynthesis of cofactors;map04976 Bile secretion;
Estriol 3-sulfate 16-glucuronide	C24H32O12S	544.161		HMDB0010356	Steroids and steroid derivatives			88727
Physalin D	C28H32O11	544.194		HMDB0034353	Steroids and steroid derivatives
Oleuroside	C25H32O13	540.184		HMDB0035352	Prenol lipids
Ethyl caproate	C8H16O2	144.115		HMDB0040209	Fatty Acyls			86055
2,6-Dimethylaniline	C8H11N	121.089	2,6-Dimethylaniline	HMDB0060677	Benzene and substituted derivatives	13187	J43.456F	28738	map00982 Drug metabolism - cytochrome P450;
Proline betaine	C7H13NO2	143.095	Stachydrine	HMDB0004827	Carboxylic acids and derivatives	12358	J5.947A	35280
Glu-Glu	C10H16N2O7	276.096	Glu-Glu	HMDB28818	Carboxylic acids and derivatives
Dihydromethysticin	C15H16O5	276.1	Dihydromethysticin	HMDB0030791	Kavalactones	12112	J14.760E	1034670
12(13)-EpOME	C18H32O3	296.235	12(13)-EpOME	HMDB0004702	Fatty Acyls	17395824	J532.640K	38299	map00591 Linoleic acid metabolism;map01100 Metabolic pathways;
Antirhine	C19H24N2O	296.189	Antirhine
2-(2-Hydroxy-2-propyl)-5-methyl-5-vinyltetrahydrofuran
Furfuryl acetate	C7H8O3	140.047		HMDB0034246	Heteroaromatic compounds
Dhurrin	C14H17NO7	311.101	Dhurrin	HMDB0060471	Organooxygen compounds	7561	J10.589I	27826	map00460 Cyanoamino acid metabolism;map01100 Metabolic pathways;map01110 Biosynthesis of secondary metabolites;
Seneciphylline	C18H23NO5	333.158	Seneciphylline
Stearic Acid	C18H36O2	284.272	Octadecanoic acid	HMDB0000827	Fatty Acyls	4692	J1.379J	28842	map00061 Fatty acid biosynthesis;map01040 Biosynthesis of unsaturated fatty acids;map01060 Biosynthesis of plant secondary metabolites;map04745 Phototransduction - fly;
Taxiphyllin	C14H17NO7	311.101	Taxiphyllin	HMDB0030704	Organooxygen compounds	4972	J480.352C	16267
Ononin;Formononetin 7-O-glucoside (Ononin)
Sesartemin	C23H26O8	430.163	Sesartemin	HMDB0038931	Furanoid lignans	13067	J759.735E
Schizandrin A
Ganoderic acid N	C30H42O8	530.288		HMDB0035325	Prenol lipids
N-Methylcoclaurine
Avenanthramide A	C16H13NO5	299.079	Avenanthramide A	HMDB38577	Cinnamic acids and derivatives
1H-Indole-2,3-dione	C8H5NO2	147.032	Isatin	HMDB0061933	Indoles and derivatives	13311	J4.342G	27539
3-(Carboxymethylamino)propanoic acid	C5H9NO4	147.053		HMDB0033550	Carboxylic acids and derivatives
Allocryptopine	C21H23NO5	369.158	Allocryptopine						map00950 Isoquinoline alkaloid biosynthesis;map01110 Biosynthesis of secondary metabolites;
Calystegine A3	C7H13NO3	159.089	Calystegine A3	HMDB38593	Tropane alkaloids				map00960 Tropane, piperidine and pyridine alkaloid biosynthesis;
Piperidine	C5H11N	85.0891	Piperidine	HMDB0034301	Piperidines	4880	J2.884C	18049	map00960 Tropane, piperidine and pyridine alkaloid biosynthesis;map04974 Protein digestion and absorption;
Sinalbin	C14H19NO10S2	425.045	Sinalbin						map00966 Glucosinolate biosynthesis;map01110 Biosynthesis of secondary metabolites;map01210 2-Oxocarboxylic acid metabolism;
alpha-Hexylcinnamaldehyde
Biliverdin	C33H34N4O6	582.248	Biliverdin	HMDB0001008	Tetrapyrroles and derivatives	3783	J10.100A	17033	map00860 Porphyrin and chlorophyll metabolism;map01100 Metabolic pathways;map01110 Biosynthesis of secondary metabolites;
(+)-Lyoniresinol 9'-O-glucoside
Cyanidin-3-O-rutinoside chloride
7-(4-Hydroxyphenyl)-1-phenyl-4-hepten-3-one	C19H20O2	280.146		HMDB0033295	Diarylheptanoids
Gluconapin	C11H19NO9S2	373.05	Gluconapin	HMDB0038427	Carbohydrates and carbohydrate conjugates	10611	J640.783H	5411
Indaconitine	C34H47NO10	629.32	Indaconitine
Malvidin-3-O-galactoside
Bruceine B	C23H28O11	480.163	Bruceine B
Acevaltrate	C24H32O10	480.2	Acevaltrate	HMDB0034494	Carboxylic acids and derivatives	96023276	J236.070E
Arachidonic acid	C20H32O2	304.24	Arachidonate	HMDB0001043	Fatty Acyls	3519	J12.228I	15843	map00590 Arachidonic acid metabolism;map00591 Linoleic acid metabolism;map01040 Biosynthesis of unsaturated fatty acids;map01100 Metabolic pathways;map04216 Ferroptosis;map04217 Necroptosis;map04270 Vascular smooth muscle contraction;map04611 Platelet activation;map04664 Fc epsilon RI signaling pathway;map04666 Fc gamma R-mediated phagocytosis;map04723 Retrograde endocannabinoid signaling;map0472…
Oleocanthal
Rutaevin	C26H30O9	486.189	Rutaevin
Arctiin	C27H34O11	534.21	Arctiin
Phillyrin;Phillyroside
N2-gamma-Glutamylglutamine	C10H17N3O6	275.112	(5-L-Glutamyl)-L-glutamine	HMDB0011738	Carboxylic acids and derivatives	7670	J392.530G	73707
Shatavarin IV
Ginsenoside Re	C48H82O18	946.55	Ginsenoside Re
Ginsenoside Rg1	C42H72O14	800.492	Ginsenoside Rg1	HMDB35857	Prenol lipids
Pilocarpine	C11H16N2O2	208.121	Pilocarpine	HMDB0015217		9677	J9.328I	8207	map01065 Biosynthesis of alkaloids derived from histidine and purine;map01110 Biosynthesis of secondary metabolites;
Anthraquinone	C14H8O2	208.052	Anthraquinone						map00624 Polycyclic aromatic hydrocarbon degradation;map01120 Microbial metabolism in diverse environments;
trans-3,5-Dimethoxy-4-hydroxy cinnamaldehydee
6-Methoxymellein	C11H12O4	208.074	6-Methoxymellein	HMDB0038510	Benzopyrans	5423	J14.898I	16252
DL-Benzylsuccinic acid
Primin	C12H16O3	208.11	Primin
Esculentoside B	C36H56O11	664.382	Esculentoside B	HMDB34636	Prenol lipids
Quillaic acid	C30H46O5	486.334	Quillaic acid
Actinidic acid	C30H46O5	486.335		HMDB0037963	Prenol lipids
Cimifugin	C16H18O6	306.11	Cimifugin
Tenulin	C17H22O5	306.147	Tenulin
22-Dehydroclerosterol	C29H46O	410.355		HMDB0034078	Steroids and steroid derivatives
Stevioside	C38H60O18	804.378	Stevioside	HMDB0034945	Prenol lipids	11381	J27.441K		map01062 Biosynthesis of terpenoids and steroids;map01110 Biosynthesis of secondary metabolites;
Vinleurosine	C46H56N4O9	808.405	Vinleurosine
Luvangetin	C15H14O4	258.089	Luvangetin
Yangonin	C15H14O4	258.089	Yangonin	HMDB0034144	Kavalactones	12166	J6.190E		map01061 Biosynthesis of phenylpropanoids;
Isogentisin	C14H10O5	258.053	Isogentisin	HMDB0030871	Benzopyrans	12256	J11.768D	6017
Norlichexanthone	C14H10O5	258.053	Norlichexanthone
Catalpalactone	C15H14O4	258.089	Catalpalactone
Absinthiin
(R)-Acetoin	C4H8O2	88.0524	Acetoin	HMDB0003243	Organooxygen compounds	3750	J2.623I	15688
Ipecoside	C27H35NO12	565.216	Ipecoside
Baptifoline	C15H20N2O2	260.152	Baptifoline	HMDB0033481	Lupin alkaloids	12938	J448.217D
Homobaldrinal	C15H16O4	260.105	Homobaldrinal
Phytanic acid	C20H40O2	312.303	Phytanate	HMDB0000801	Prenol lipids	4760	J14.320K	16285
Kuwanon H	C45H44O11	760.288	Kuwanone H	HMDB0030075	Flavonoids	12286	J46.690E
Anacrotine	C18H25NO6	351.168	Anacrotine
Oxoglaucine	C20H17NO5	351.111		HMDB0029337	Aporphines			545617
Crotanecine	C8H13NO3	171.089	Crotanecine
Doronine	C21H30ClNO8	459.166	Doronine
Riddelline	C18H23NO6	349.152	Riddelline
Myricanone	C21H24O5	356.162		HMDB0030798	Diarylheptanoids
Tropacocaine	C15H19NO2	245.142	Tropacocaine
Benzoyltropein	C15H19NO2	245.142	Benzoyltropein
Paeonolide	C20H28O12	460.158	Paeonolide
Leiocarposide	C27H34O16	614.185	Leiocarposide
Piperlonguminine	C17H19NO5	317.126	Piplartine	HMDB0030341	Cinnamic acids and derivatives	12352	J14.252B	564921
Cochlearine	C15H19NO3	261.137	Cochlearine
Podophyllotoxinone
5-Methyl-2-furaldehyde	C6H6O2	110.037	5-Methyl-2-furaldehyde	HMDB33002	Organooxygen compounds
Podophyllotoxin	C22H22O8	414.132	Podophyllotoxin	HMDB15310	Lignan lactones				map00998 Biosynthesis of various secondary metabolites - part 2;map01061 Biosynthesis of phenylpropanoids;map01110 Biosynthesis of secondary metabolites;
NG,NG-Dimethylarginine dihydrochloride
Homodihydrocapsaicin I
Tetrodotoxin	C11H17N3O8	319.102	Tetrodotoxin
Oxychelerythrine	C21H17NO5	363.111	Oxychelerythrine
Deoxypodophyllotoxin	C22H22O7	398.137	Deoxypodophyllotoxin						map00998 Biosynthesis of various secondary metabolites - part 2;map01110 Biosynthesis of secondary metabolites;
Aconitine	C34H47NO11	645.315	Aconitine						map00904 Diterpenoid biosynthesis;map01066 Biosynthesis of alkaloids derived from terpenoid and polyketide;
Acarbose	C25H43NO18	645.248	Acarbose	HMDB0014429	Organooxygen compounds	9021	J33.395F	2376	map00525 Acarbose and validamycin biosynthesis;map01100 Metabolic pathways;map01110 Biosynthesis of secondary metabolites;
Genipin-1-O-gentiobioside
Neoglycyrol	C21H18O6	366.11	Glycyrol	HMDB0033882	Isoflavonoids	96023454	J330.866I
4'-Demethylpodophyllotoxin	C21H20O8	400.116	4'-Demethylpodophyllotoxin
Yatein	C22H24O7	400.152	Yatein						map00998 Biosynthesis of various secondary metabolites - part 2;map01110 Biosynthesis of secondary metabolites;
alpha-Peltatin	C21H20O8	400.116	alpha-Peltatin
Sweroside	C16H22O9	358.126	Sweroside
Epifriedelanol
Ergosterol peroxide	C28H44O3	428.329		HMDB0037941	Steroids and steroid derivatives
10-Gingerol	C17H26O4	294.183	[6]-Gingerol	HMDB0005783	Phenols	12645	J46.683B		map00945 Stilbenoid, diarylheptanoid and gingerol biosynthesis;map01110 Biosynthesis of secondary metabolites;
3-O-Acetyl-11-keto-beta-boswellic acid
4-Nitrocatechol	C6H5NO4	155.022	4-Nitrocatechol	HMDB0002916	Phenols	5299	J205.396I	16318	map00627 Aminobenzoate degradation;map01120 Microbial metabolism in diverse environments;
Methylisopelletierine	C9H17NO	155.131	N-Methylpelletierine	HMDB0030326	Piperidines	8435	J259.505B	7321	map00960 Tropane, piperidine and pyridine alkaloid biosynthesis;map01064 Biosynthesis of alkaloids derived from ornithine, lysine and nicotinic acid;map01110 Biosynthesis of secondary metabolites;
Mangostanol	C24H26O7	426.168		HMDB0029868	Benzopyrans			790705
1-Isomangostin hydrate	C24H28O7	428.184		HMDB0029984	Benzopyrans			1253308
Roemerine	C18H17NO2	279.126		HMDB0030264	Aporphines			154743
Hypotaurine	C2H7NO2S	109.02	Hypotaurine	HMDB0000965	Sulfinic acids and derivatives	3802	J11.604A	16668	map00430 Taurine and hypotaurine metabolism;map01100 Metabolic pathways;
5-Heneicosylresorcinol	C27H48O2	404.365		HMDB0031035	Phenols			1258594
Soyacerebroside I	C40H75NO9	713.544		HMDB0032677	Sphingolipids
Allura Red AC	C18H16N2O8S2	452.035		HMDB0032884	Naphthalenes
Hamamelitannin	C20H20O14	484.085		HMDB0033785	Benzene and substituted derivatives
Ganoderenic acid E	C30H40O8	528.272		HMDB0035797	Prenol lipids
Formononetin	C16H12O4	268.074	Formononetin	HMDB0005808	Isoflavonoids	4115	J12.525C	18088	map00943 Isoflavonoid biosynthesis;map01061 Biosynthesis of phenylpropanoids;map01110 Biosynthesis of secondary metabolites;
Dalbergin	C16H12O4	268.074	Dalbergin
Inosine	C10H12N4O5	268.081	Inosine	HMDB0000195	Purine nucleosides	3588	J1.388I	17596	map00230 Purine metabolism;map01100 Metabolic pathways;map02010 ABC transporters;
Methyl linoleate	C19H34O2	294.256		HMDB0034381	Fatty Acyls			69080
Skimmianin
Ganoderal A	C30H44O2	436.334		HMDB0035983	Prenol lipids
Limonexic acid	C26H30O10	502.184		HMDB0036075	Steroids and steroid derivatives
8-Hydroxybergapten	C12H8O5	232.037		HMDB0036628	Coumarins and derivatives
Mulberrofuran Q	C34H24O10	592.137		HMDB0036637	2-arylbenzofuran flavonoids
Undecanolactone
Pyridoxine	C8H11NO3	169.074	Pyridoxine	HMDB0000239	Pyridines and derivatives	3608	J2.356F	16709	map00750 Vitamin B6 metabolism;map01100 Metabolic pathways;map01120 Microbial metabolism in diverse environments;
Norepinephrine	C8H11NO3	169.074	L-Noradrenaline	HMDB0000216	Phenols	3828	J9.223A	18357	map00350 Tyrosine metabolism;map01100 Metabolic pathways;map02020 Two-component system;map02024 Quorum sensing;map04024 cAMP signaling pathway;map04080 Neuroactive ligand-receptor interaction;map04261 Adrenergic signaling in cardiomyocytes;map04270 Vascular smooth muscle contraction;map04540 Gap junction;map04714 Thermogenesis;map04721 Synaptic vesicle cycle;map04742 Taste transduction;map04923 R…
O-Phosphocholine	C5H15NO4P	184.074	Choline phosphate	HMDB0001565	Organonitrogen compounds	3867	J215.288F	18132	map00564 Glycerophospholipid metabolism;map01100 Metabolic pathways;map05231 Choline metabolism in cancer;
Glycyrrhetic acid 3-O-mono-beta-D-glucuronide
Jangomolide	C26H28O8	468.178		HMDB0038158	Steroids and steroid derivatives
Cassiaside B	C26H30O14	566.164		HMDB0038477	Naphthopyrans
5-Heptadecylresorcinol	C23H40O2	348.303		HMDB0038530	Phenols
Goshonoside F1	C26H44O8	484.304		HMDB0038539	Prenol lipids
1-Cinnamoylpyrrolidine
6''-O-Acetylglycitin	C24H24O11	488.132		HMDB0039489	Isoflavonoids
Adenosine triphosphate	C10H16N5O13P3	506.996	ATP	HMDB0000538	Purine nucleotides	3304	J10.680A	15422	map00190 Oxidative phosphorylation;map00195 Photosynthesis;map00230 Purine metabolism;map00908 Zeatin biosynthesis;map00998 Biosynthesis of various secondary metabolites - part 2;map01100 Metabolic pathways;map01110 Biosynthesis of secondary metabolites;map03070 Bacterial secretion system;map04020 Calcium signaling pathway;map04066 HIF-1 signaling pathway;map04080 Neuroactive ligand-receptor inte…
L-Acetylcarnitine	C9H17NO4	203.116		HMDB0000201	Fatty Acyls			57589
Glabridin	C20H20O4	324.136	Glabridin	HMDB0034188	Isoflavonoids	12607	J649.087E
Kojibiose	C12H22O11	342.116	Kojibiose	HMDB0011742	Fatty Acyls	124490284		33020
alpha-Tocopherol	C29H50O2	430.381	alpha-Tocopherol	HMDB0001893	Prenol lipids	5492	J24.260H	18145	map00130 Ubiquinone and other terpenoid-quinone biosynthesis;map01060 Biosynthesis of plant secondary metabolites;map01100 Metabolic pathways;map01110 Biosynthesis of secondary metabolites;map04216 Ferroptosis;map04977 Vitamin digestion and absorption;
Spinosin	C28H32O15	608.174	Spinosin
Syringic acid	C9H10O5	198.053	Syringic acid	HMDB0002085	Benzene and substituted derivatives	13016	J11.712I	68329	map00627 Aminobenzoate degradation;map01120 Microbial metabolism in diverse environments;
Guaiazulene	C15H18	198.141	Guaiazulene	HMDB0036648	Prenol lipids	11865	J11.635A	5550
Ethyl gallate	C9H10O5	198.053		HMDB0033836	Benzene and substituted derivatives			87247
Enterolactone	C18H18O4	298.121		HMDB0006101	Furanoid lignans			562788
6,7-Dehydroferruginol
Homopterocarpin
Genkwanin	C16H12O5	284.068	Genkwanin
Prunetin	C16H12O5	284.068	Prunetin	HMDB0034127	Isoflavonoids	12704	J61.257J	8600	map00943 Isoflavonoid biosynthesis;
Calycosin	C16H12O5	284.068	Calycosin						map00943 Isoflavonoid biosynthesis;map01110 Biosynthesis of secondary metabolites;
(-)-Maackiain	C16H12O5	284.068		HMDB0036629	Isoflavonoids			73029
Retinoic acid	C20H28O2	300.209	Retinoic acid	HMDB01852	Prenol lipids				map00830 Retinol metabolism;map01100 Metabolic pathways;map04659 Th17 cell differentiation;map04672 Intestinal immune network for IgA production;map05200 Pathways in cancer;map05222 Small cell lung cancer;map05223 Non-small cell lung cancer;map05226 Gastric cancer;
Questinol	C16H12O6	300.063	Questinol	HMDB0034443	Anthracenes	96024116	J269.595B
Farrerol	C17H16O5	300.1	Farrerol
Vitamin K1	C31H46O2	450.35	Phylloquinone	HMDB0003555	Prenol lipids	5148	J3.883K	583972	map00130 Ubiquinone and other terpenoid-quinone biosynthesis;map01100 Metabolic pathways;map01110 Biosynthesis of secondary metabolites;map04977 Vitamin digestion and absorption;
Thiamine	C12H17N4OS	265.112	Thiamine	HMDB0000235	Diazines	3668	J203.781E	18385	map00730 Thiamine metabolism;map01100 Metabolic pathways;map02010 ABC transporters;map04122 Sulfur relay system;map04977 Vitamin digestion and absorption;
N-Î³-Acetyl-N-2-Formyl-5-methoxykynurenamine
Phenylacetyl-L-glutamine	C13H16N2O4	264.111	Phenylacetylglutamine	HMDB0006344	Carboxylic acids and derivatives	6833	J75.641E	17884	map00360 Phenylalanine metabolism;
1,7-Diphenyl-4-hepten-3-one	C19H20O	264.151		HMDB0031873	Diarylheptanoids
Cinnamyl cinnamate	C18H16O2	264.115		HMDB0033832	Cinnamic acids and derivatives
Sarsasapogenin	C27H44O3	416.329	Sarsasapogenin	HMDB0030024	Steroids and steroid derivatives	6684	J5.383J	15578
Octadecyl p-coumarate
Riboflavine	C17H20N4O6	376.138	Riboflavin	HMDB0000244	Pteridines and derivatives	3554	J3.876H	17015	map00740 Riboflavin metabolism;map01100 Metabolic pathways;map01110 Biosynthesis of secondary metabolites;map02010 ABC transporters;map04977 Vitamin digestion and absorption;
Ailanthone	C20H24O7	376.152	Ailanthone
Tripdiolide	C20H24O7	376.152	Tripdiolide
Picrasin B	C21H28O6	376.189	Picrasin B
Pyridoxal 5'-phosphate	C8H10NO6P	247.025	Pyridoxal phosphate	HMDB0001491	Pyridines and derivatives	3320	J10.690I	18405	map00730 Thiamine metabolism;map00750 Vitamin B6 metabolism;map01100 Metabolic pathways;map04977 Vitamin digestion and absorption;
5,7-Dihydroxyisoflavone	C15H10O4	254.058	Mefenamic acid	HMDB0030699	Isoflavonoids	5243	J2.344B	1012277
Eupatolide	C15H20O3	248.141	Eupatolide
1beta-Hydroxyalantolactone	C15H20O3	248.141		HMDB0031970	Prenol lipids
Pterosin D
Matrine	C15H24N2O	248.189	Matrine
6-Hydroxymelatonin	C13H16N2O3	248.116	6-Hydroxymelatonin	HMDB0004081	Indoles and derivatives	7954	J102.947I	2198	map00380 Tryptophan metabolism;
Nicotinic acid	C6H5NO2	123.032	Nicotinate	HMDB0001488	Pyridines and derivatives	3552	J2.809F	15940	map00760 Nicotinate and nicotinamide metabolism;map00960 Tropane, piperidine and pyridine alkaloid biosynthesis;map01060 Biosynthesis of plant secondary metabolites;map01064 Biosynthesis of alkaloids derived from ornithine, lysine and nicotinic acid;map01100 Metabolic pathways;map01110 Biosynthesis of secondary metabolites;map01120 Microbial metabolism in diverse environments;map05133 Pertussis;
2-Picolinic acid	C6H5NO2	123.032	Picolinic acid	HMDB0002243	Pyridines and derivatives	12350	J45.682I	28747	map00380 Tryptophan metabolism;map01100 Metabolic pathways;
Dehydroepiandrosterone	C19H28O2	288.209	Dehydroepiandrosterone	HMDB0000077	Steroids and steroid derivatives	4449	J4.147E	220467	map00140 Steroid hormone biosynthesis;map00984 Steroid degradation;map01100 Metabolic pathways;map01120 Microbial metabolism in diverse environments;map04913 Ovarian steroidogenesis;map05200 Pathways in cancer;map05215 Prostate cancer;
Aromadendrin	C15H12O6	288.063	Dihydrokaempferol	HMDB0030847	Flavonoids	4223	J12.461C	15401	map00941 Flavonoid biosynthesis;map01061 Biosynthesis of phenylpropanoids;map01100 Metabolic pathways;map01110 Biosynthesis of secondary metabolites;
Shikonin	C16H16O5	288.1	Shikonin						map00130 Ubiquinone and other terpenoid-quinone biosynthesis;map01110 Biosynthesis of secondary metabolites;
Fustin	C15H12O6	288.063	Fustin						map00941 Flavonoid biosynthesis;
Bovinic acid	C18H32O2	280.24	Rumenic acid	HMDB0003797	Fatty Acyls	6756	J604.211B	32798	map00591 Linoleic acid metabolism;
4'-O-Methylirenolone
Abietic acid	C20H30O2	302.225	Abietic acid						map00904 Diterpenoid biosynthesis;map01100 Metabolic pathways;map01110 Biosynthesis of secondary metabolites;
Eicosapentaenoic acid	C20H30O2	302.225	(5Z,8Z,11Z,14Z,17Z)-Icosapentaenoic acid	HMDB0001999	Fatty Acyls	8663	J343.473G	28364	map01040 Biosynthesis of unsaturated fatty acids;
11b-Hydroxyandrost-4-ene-3,17-dione	C19H26O3	302.188	11beta-Hydroxyandrost-4-ene-3,17-dione	HMDB0006773	Steroids and steroid derivatives	7671	J104.102I	27967	map00140 Steroid hormone biosynthesis;
Hesperetin	C16H14O6	302.079	Hesperetin	HMDB0005782	Flavonoids	4847	J9.235E	28230	map00941 Flavonoid biosynthesis;
Homoeriodictyol	C16H14O6	302.079	Homoeriodictyol						map00941 Flavonoid biosynthesis;
Nordihydroguaiaretic acid	C18H22O4	302.152	Nordihydroguaiaretic acid	HMDB0014325	Dibenzylbutane lignans	12902	J9.195B	73468
Kaurenoic acid	C20H30O2	302.225	Kaurenoic acid						map00904 Diterpenoid biosynthesis;map01100 Metabolic pathways;map01110 Biosynthesis of secondary metabolites;
Byakangelicol	C17H16O6	316.095	Byakangelicol
Cajanol	C17H16O6	316.095	Cajanol	HMDB0033924	Isoflavonoids	12390	J18.066A
D-Pantothenic acid	C9H17NO5	219.111	Pantothenate	HMDB0000210	Alcohols and polyols	4121	J4.242K	46905	map00410 beta-Alanine metabolism;map00770 Pantothenate and CoA biosynthesis;map01100 Metabolic pathways;map01110 Biosynthesis of secondary metabolites;map04977 Vitamin digestion and absorption;
O-Succinyl-L-homoserine	C8H13NO6	219.074	O-Succinyl-L-homoserine						map00270 Cysteine and methionine metabolism;map00920 Sulfur metabolism;map01100 Metabolic pathways;map01110 Biosynthesis of secondary metabolites;map01230 Biosynthesis of amino acids;
7alpha-Hydroxypregnenolone	C21H32O3	332.235	7alpha-Hydroxypregnenolone	HMDB0060424	Steroids and steroid derivatives	96024258	J704.244B		map00140 Steroid hormone biosynthesis;
Ascorbic acid	C6H8O6	176.032	Monodehydroascorbate	HMDB0000044	Dihydrofurans	4283		29073	map00053 Ascorbate and aldarate metabolism;map01100 Metabolic pathways;
Herniarin	C10H8O3	176.047	Herniarin	HMDB0029758	Coumarins and derivatives	11459	J11.715C	5679
3-Isopropylmalate	C7H12O5	176.068	(2R,3S)-3-Isopropylmalate	HMDB0012156	Fatty Acyls	7045	J1.641.400J	43468	map00290 Valine, leucine and isoleucine biosynthesis;map01100 Metabolic pathways;map01110 Biosynthesis of secondary metabolites;map01210 2-Oxocarboxylic acid metabolism;map01230 Biosynthesis of amino acids;
Ethyl cinnamate	C11H12O2	176.084		HMDB0033834	Cinnamic acids and derivatives
Cinnamyl acetat
Serotonin	C10H12N2O	176.095	Serotonin	HMDB0000259	Indoles and derivatives	4041	J4.107F	28790	map00380 Tryptophan metabolism;map01063 Biosynthesis of alkaloids derived from shikimate pathway;map01100 Metabolic pathways;map04024 cAMP signaling pathway;map04080 Neuroactive ligand-receptor interaction;map04361 Axon regeneration;map04540 Gap junction;map04721 Synaptic vesicle cycle;map04726 Serotonergic synapse;map04742 Taste transduction;map04750 Inflammatory mediator regulation of TRP chann…
Streptomycin	C21H39N7O12	581.266	Streptomycin	HMDB0015214	Organooxygen compounds	3703	J4.500D	17076	map00521 Streptomycin biosynthesis;map01100 Metabolic pathways;map01110 Biosynthesis of secondary metabolites;
D-Glutamine	C5H10N2O3	146.069	D-Glutamine	HMDB0003423	Carboxylic acids and derivatives	4077	J9.211H	17061	map00471 D-Glutamine and D-glutamate metabolism;map01100 Metabolic pathways;
Diallyl disulfide	C6H10S2	146.022	Diallyl disulfide	HMDB0033966	Allyl sulfur compounds	10565	J1.800G	4488
Formylanthranilic acid	C8H7NO3	165.043	Formylanthranilate	HMDB0004089	Benzene and substituted derivatives	7964	J576.445I	36575	map00380 Tryptophan metabolism;map01100 Metabolic pathways;
Benzocaine	C9H11NO2	165.079	Benzocaine	HMDB0004992	Benzene and substituted derivatives	9730	J4.690F	116735
Hordenine	C10H15NO	165.115	Hordenine	HMDB0004366	Benzene and substituted derivatives	8449	J6.381I	5764	map00350 Tyrosine metabolism;map01100 Metabolic pathways;
5-(3-Pyridyl)-2-hydroxytetrahydrofuran	C9H11NO2	165.079	5-(3-Pyridyl)-2-hydroxytetrahydrofuran	HMDB0062407	Pyridines and derivatives	124490250		82572	map00980 Metabolism of xenobiotics by cytochrome P450;map05204 Chemical carcinogenesis;
5,6-Dihydroxyindole	C8H7NO2	149.048	5,6-Dihydroxyindole	HMDB0004058	Indoles and derivatives	7904	J434.158I	27404	map00350 Tyrosine metabolism;map01100 Metabolic pathways;
Tacrolimus	C44H69NO12	803.482		HMDB0015002	Macrolide lactams
Epicatechin;(+)-Epicatechin
L-Homoserine	C4H9NO3	119.058	L-Homoserine	HMDB0000719	Carboxylic acids and derivatives	3561	J9.199E	15699	map00260 Glycine, serine and threonine metabolism;map00270 Cysteine and methionine metabolism;map00300 Lysine biosynthesis;map00920 Sulfur metabolism;map01100 Metabolic pathways;map01110 Biosynthesis of secondary metabolites;map01120 Microbial metabolism in diverse environments;map01230 Biosynthesis of amino acids;
L-Homoglutamic acid
3-Oxoadipic acid	C6H8O5	160.037	3-Oxoadipate	HMDB0000398	Keto acids and derivatives	4103	J309.041H	37440	map00362 Benzoate degradation;map01100 Metabolic pathways;map01120 Microbial metabolism in diverse environments;map01220 Degradation of aromatic compounds;
Tropine acetate;3-Acetoxytropane
2'-Hydroxydihydrodaidzein;Butin
Citrostadienol
alpha-Zearalenol;beta-Zearalenol
4-Hydroxyphenylacetaldehyde;4'-Hydroxyacetophenone
Palmitoleic acid;Alizarin 2-methyl ether
Coniferin;Myzodendrone
Eurycomalactone;Ingenol
(-)-Borneol;(+)-Borneol
Alpha-Terpineol;Patulin
Isopulegol	C10H18O	154.136		HMDB0036077	Prenol lipids
Beta-D-Glucose;alpha-D-Glucose
Luteolin-6-C-glucoside;Orientin
1,2-Epoxy-p-menth-8-ene;Ortho-Hydroxyphenylacetic acid
(2E)-Decenoyl-ACP;L-Pipecolic acid;Pipecolic acid
Cyanidin 3-rutinoside;Biorobin
Gamabufotalin;Telocinobufagin
Zeorin;Dammarenediol II
25-Hydroxyvitamin D2-25-glucuronide;25-Hydroxyvitamin D2 25-(beta-glucuronide)
Amabiline;Supinine
Deltonin;Gracillin
Mascaroside;Secoisolariciresinol monoglucoside
Retrorsine;Usaramine
Physalin L;Physalin O
Benzoyl glucuronide (Benzoic acid);2-Phenylethanol glucuronide
Abscisic acid;(S)-Abscisic acid
Neogrifolin;Grifolin;Ugaxanthone
Anhydroglycinol;Digiferruginol;Rubiadin
alpha-Cyperol;Alismol;Spathulenol
Physcion 1-O-beta-D-glucoside;Sissotrin;Physcion 8-O-beta-D-monoglucoside
Alisol B;Macrocarpal B;Macrocarpal H
Isorubrofusarin 10-gentiobioside;Rubrofusarin-6-O-beta-D-gentiobioside;Cassiaside C
Oleic acid;Vaccenic acid;Petroselinic acid
Ganoderic acid A;Ganoderenic acid C;Ganoderic acid B
Cucurbitacin I;Ganoderenic acid A;Ganoderic acid C1;Ganoderenic acid B;Ganoderic acid Z
2-Chloro-DL-Phenylalanine
